# Supplementary material
Source: PubMed Central journal article supplement (PMC4125390)
Supplement: 1fe14f275c557a9e4c053b33f6cb1420_genetics.114.166124-8.pdf [file 1fe14f275c557a9e4c053b33f6cb1420_genetics.114.166124-8.pdf]

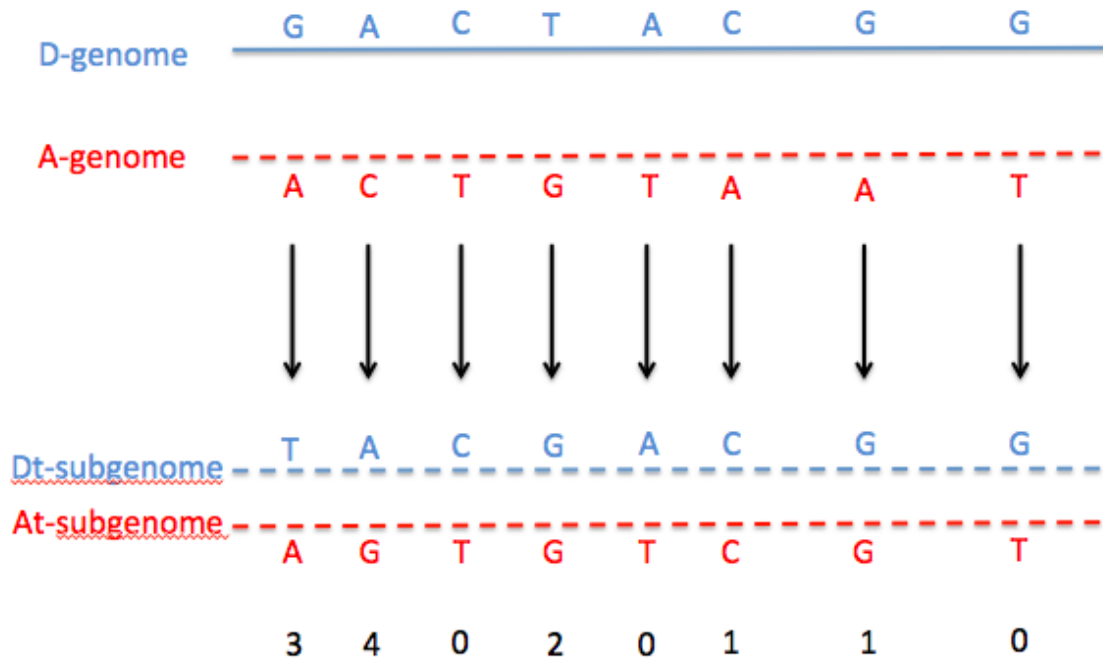

**Figure S6** Identification of converted alleles. A-genome and D-genome are diploid progenitor genomes. At- and Dt-subgenome are tetraploid genomes with At-genome derived from A-genome and Dt-genome derived from D-genome. Solid line represents cotton reference genome and broken line indicates re-sequenced genomes. Sites with number “0” represents no allele changes in the tetraploid genomes, likewise, “1”: At to Dt conversion; “2”: Dt to At conversion; “3”: Dt mutation; “4”: At mutation.
