# Supplementary material
Source: PubMed Central journal article supplement (PMC4125390)
Supplement: 03cddb2f5a26f243c28ea15f7aa6afc8_genetics.114.166124-10.pdf [file 03cddb2f5a26f243c28ea15f7aa6afc8_genetics.114.166124-10.pdf]

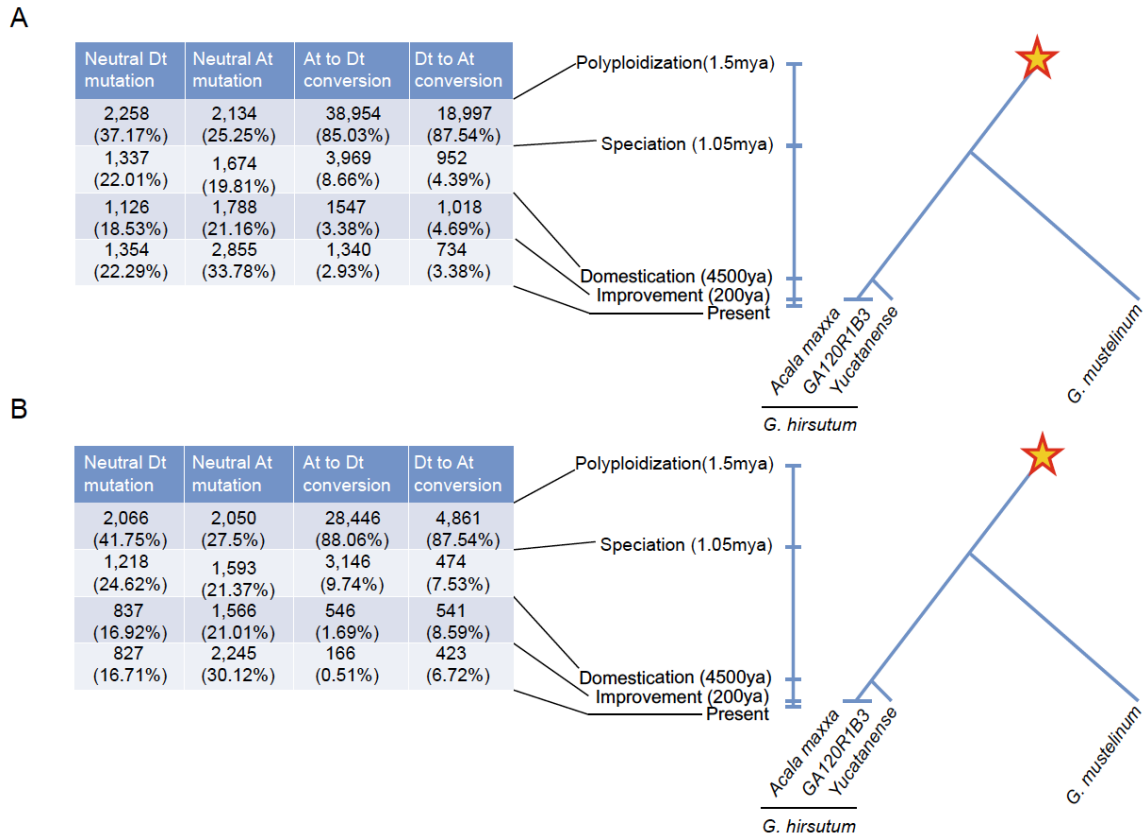

**Figure S1** Timing of inter-genomic conversion. The star marks AD allopolyploidization occurring ~1-2 million years ago. (A) The numbers (proportion) of At, Dt neutral mutations (in intergenic region) and At to Dt conversions in both HC and LC are shown in each evolutionary time scale. (B) The numbers (proportion) of At, Dt neutral mutations (in intergenic region) and At to Dt conversions in HC are shown in each evolutionary time scale.
