# Supplementary material
Source: PubMed Central journal article supplement (PMC4125390)
Supplement: 6ef995d3f703bfba05c5a94475179916_genetics.114.166124-5.pdf [file 6ef995d3f703bfba05c5a94475179916_genetics.114.166124-5.pdf]

A

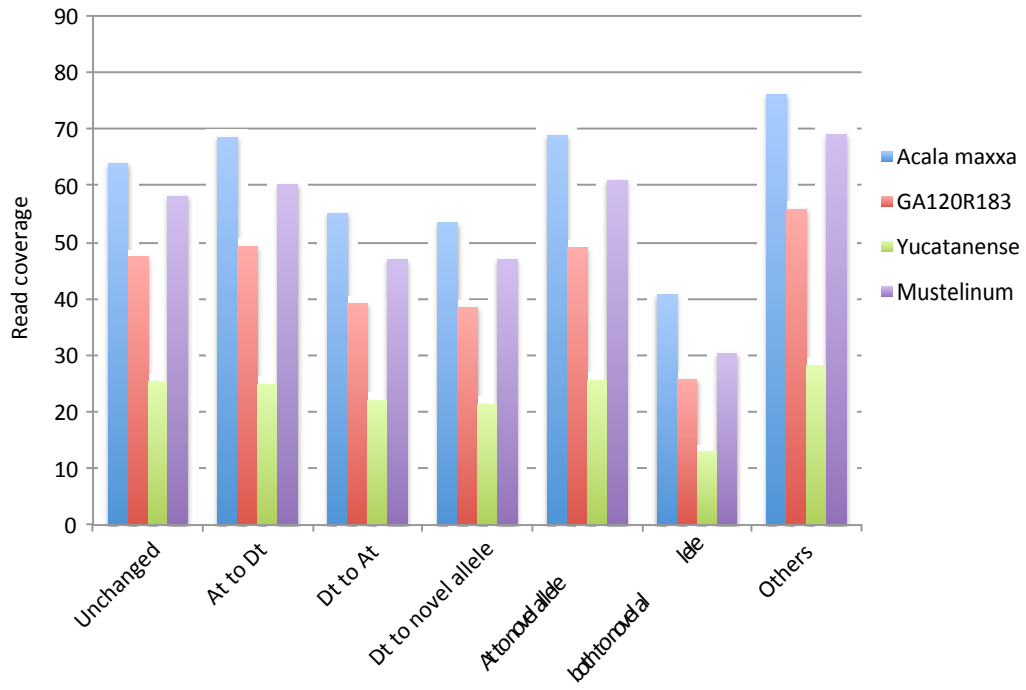

B

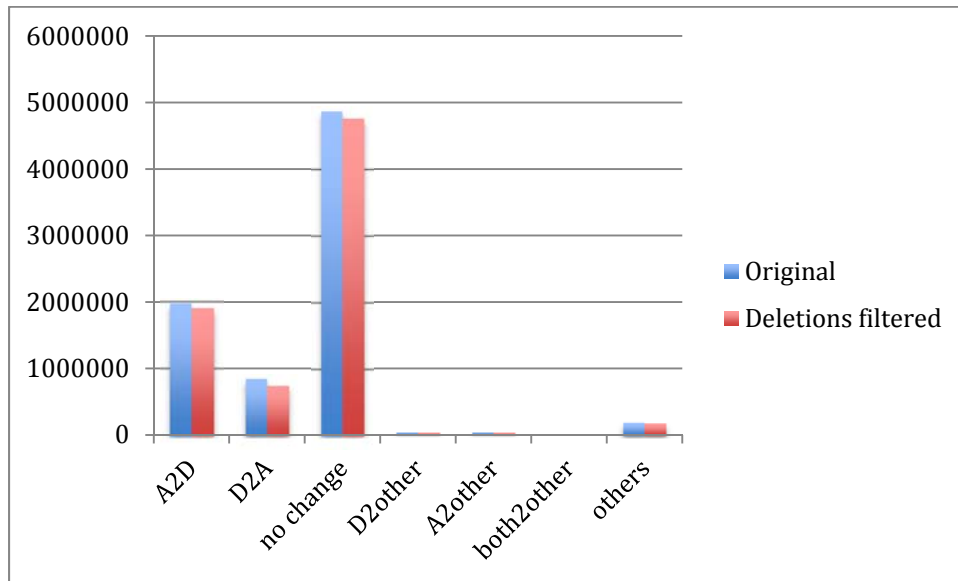

C

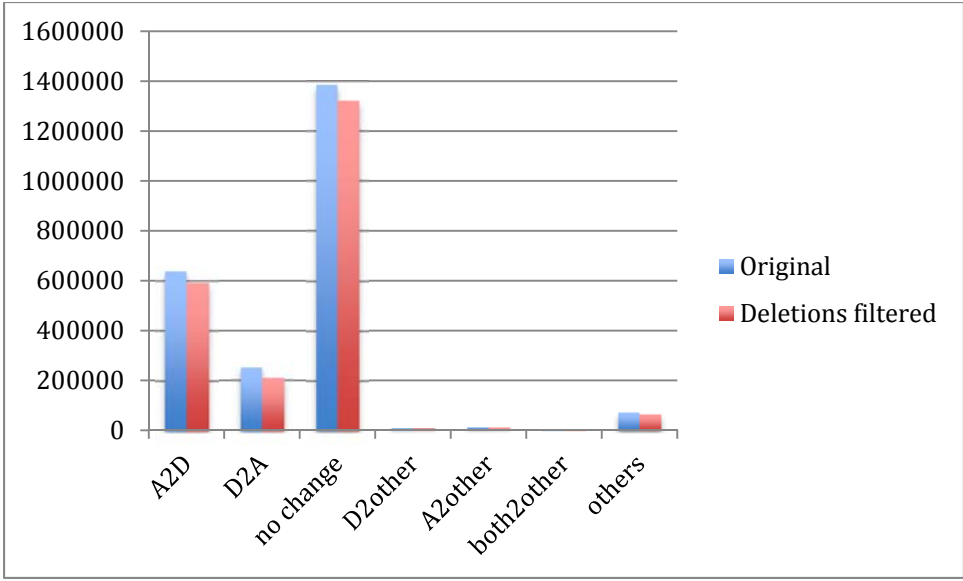

D

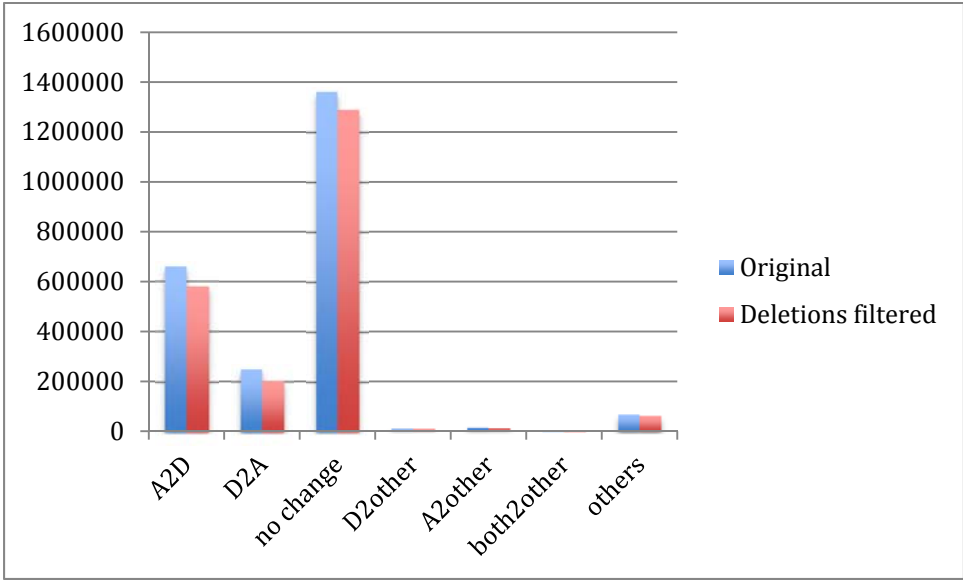

E

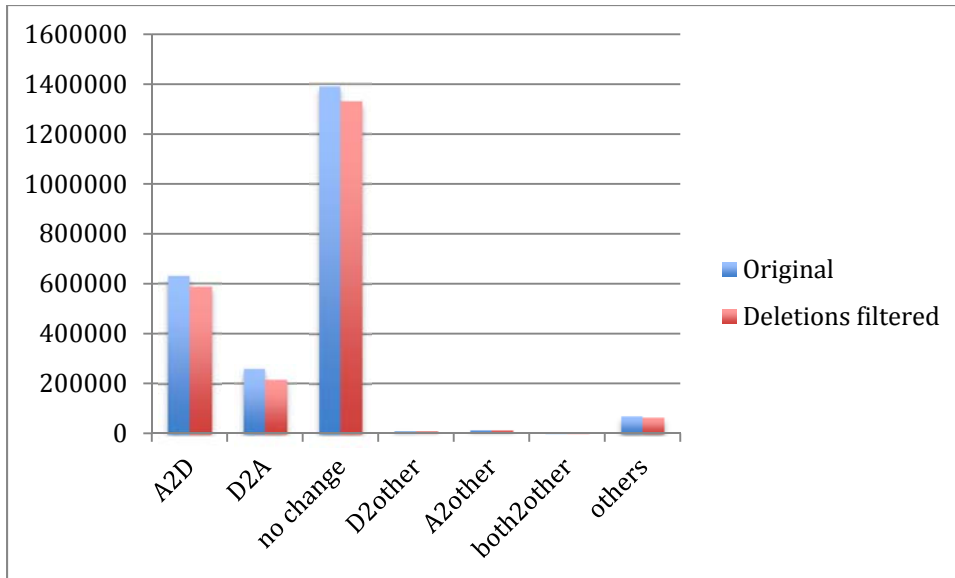

**Figure S7** (A) Average mapped read coverage for different mutation categories in four cotton species. (B-E) Effects of deletion. Blue bar shows number of sites in each mutation category. Red bar shows number of sites after removal of the ones with reads coverage less than or equal to half of the average read coverage of each chromosome. (B) *Acala Maxxa*, (C) *GA120R183*, (D) *Yucatanense*, (E) *G. mustelinum*
