# Supplementary material
Source: PubMed Central journal article supplement (PMC4125390)
Supplement: 49b6d47c9829d7f69f5a6afa889cc518_genetics.114.166124-1.pdf [file 49b6d47c9829d7f69f5a6afa889cc518_genetics.114.166124-1.pdf]

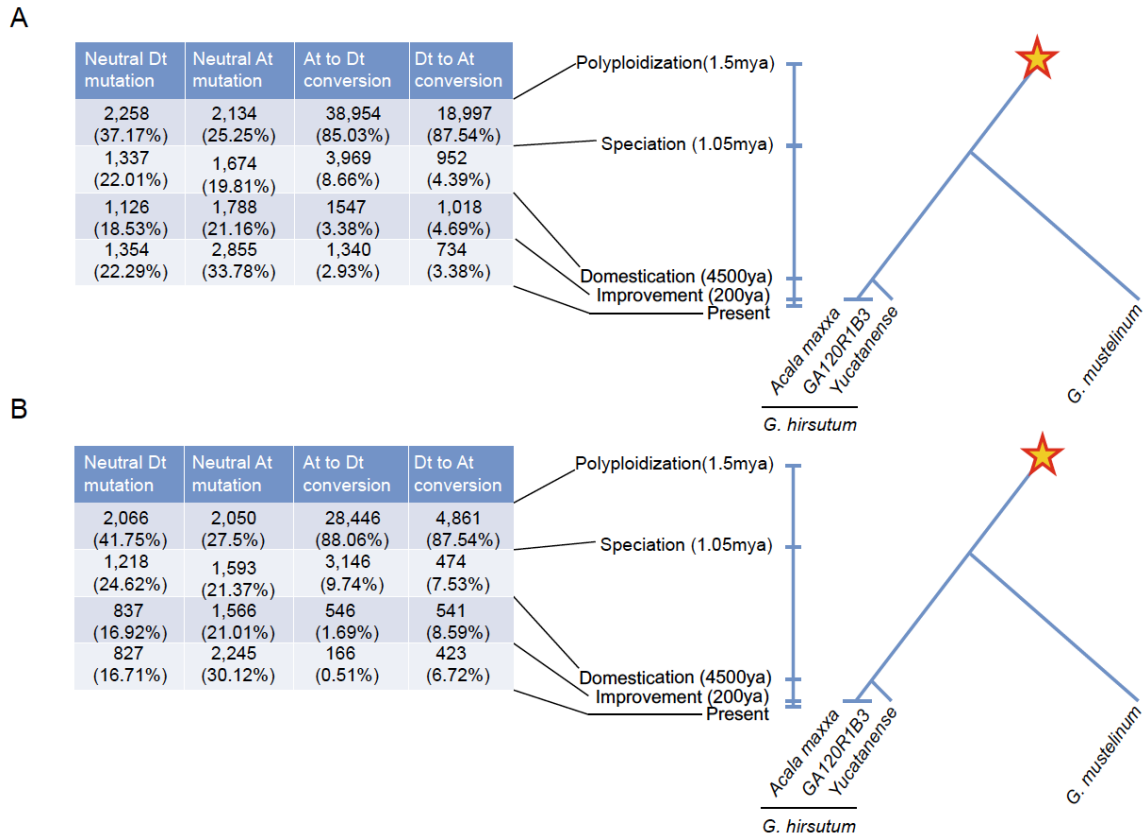

**Figure S1** Timing of inter-genomic conversion. The star marks AD allopolyploidization occurring ~1-2 million years ago. (A) The numbers (proportion) of At, Dt neutral mutations (in intergenic region) and At to Dt conversions in both HC and LC are shown in each evolutionary time scale. (B) The numbers (proportion) of At, Dt neutral mutations (in intergenic region) and At to Dt conversions in HC are shown in each evolutionary time scale.

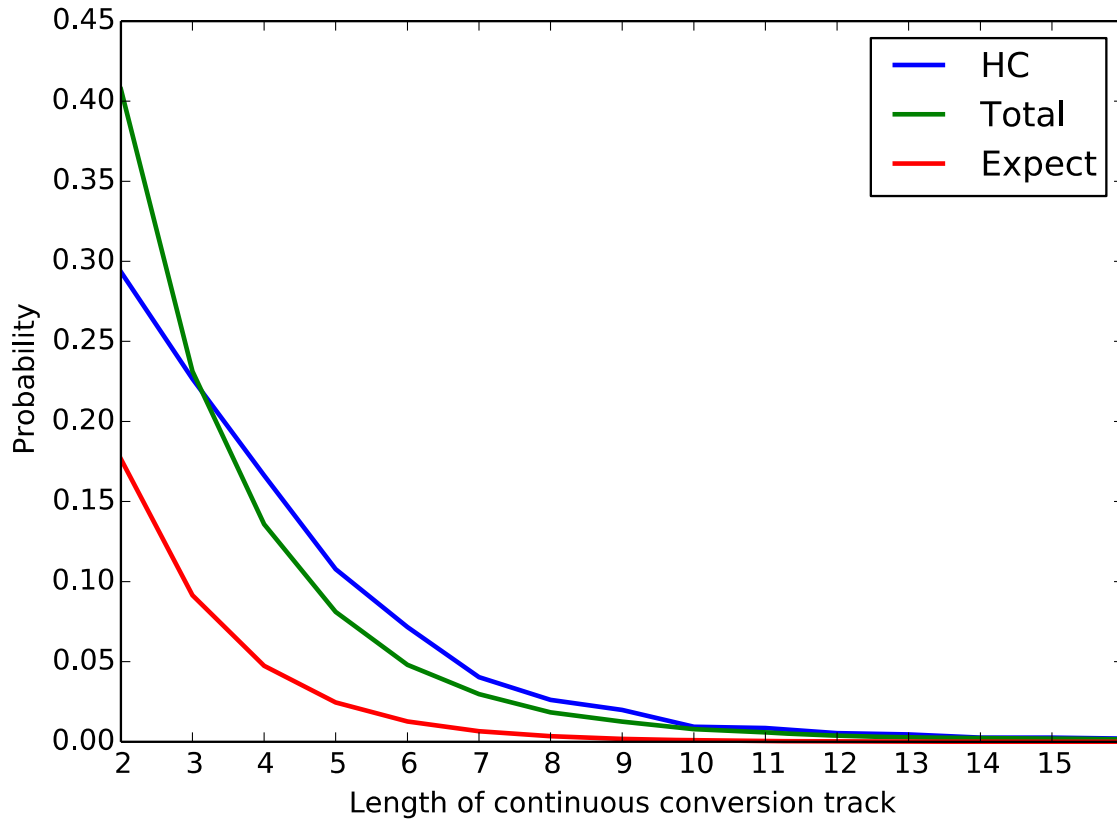

**Figure S2** Frequency distribution of the length of conversion tracks measured by number of continuous converted alleles. Red line is expected distribution (exponential) of the length of continuous random mutations. Green line is the distribution of total number of conversions in the genome. Blue line is the distribution of conversions in HC.

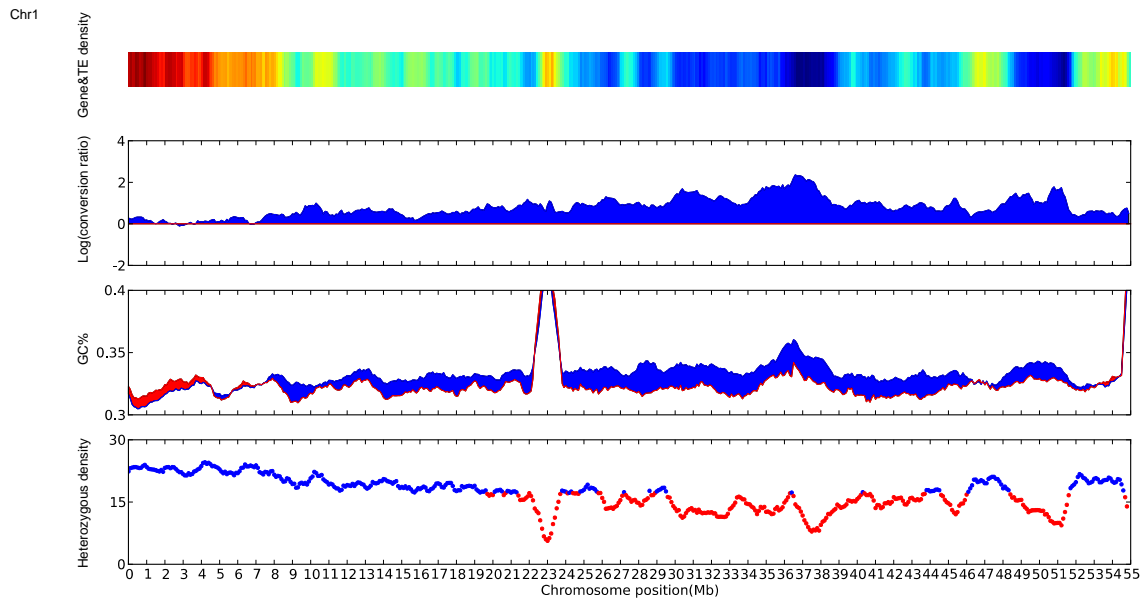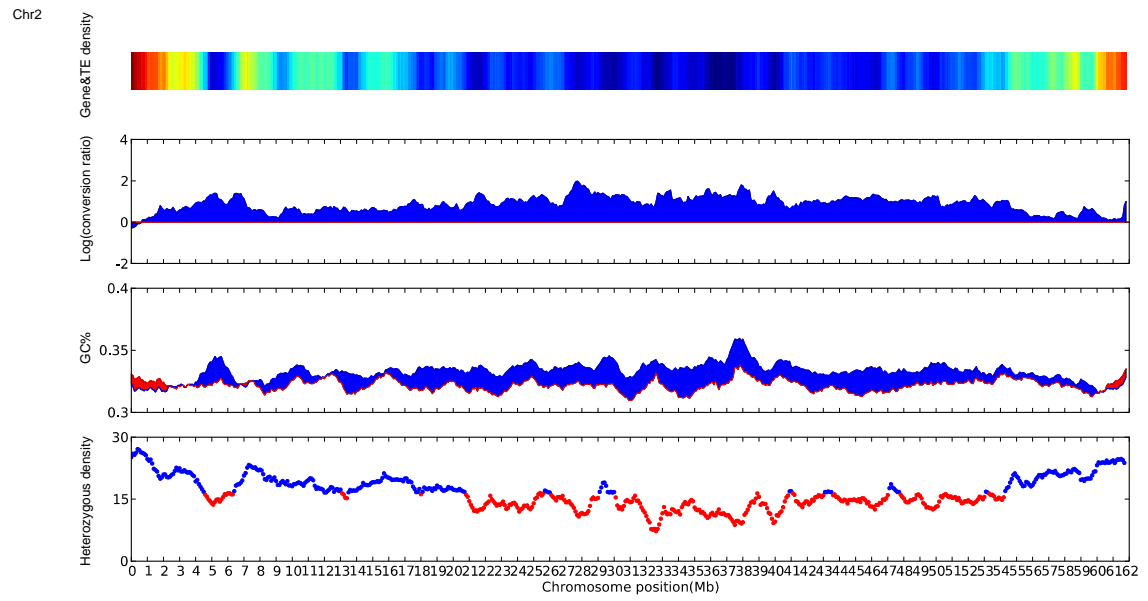

Chr3

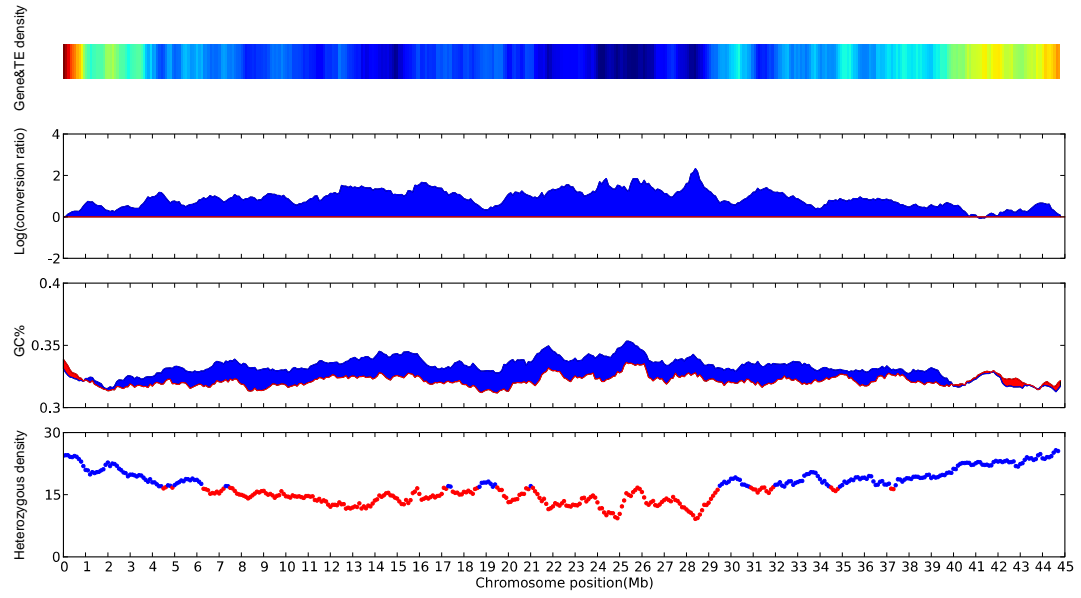

Chr5

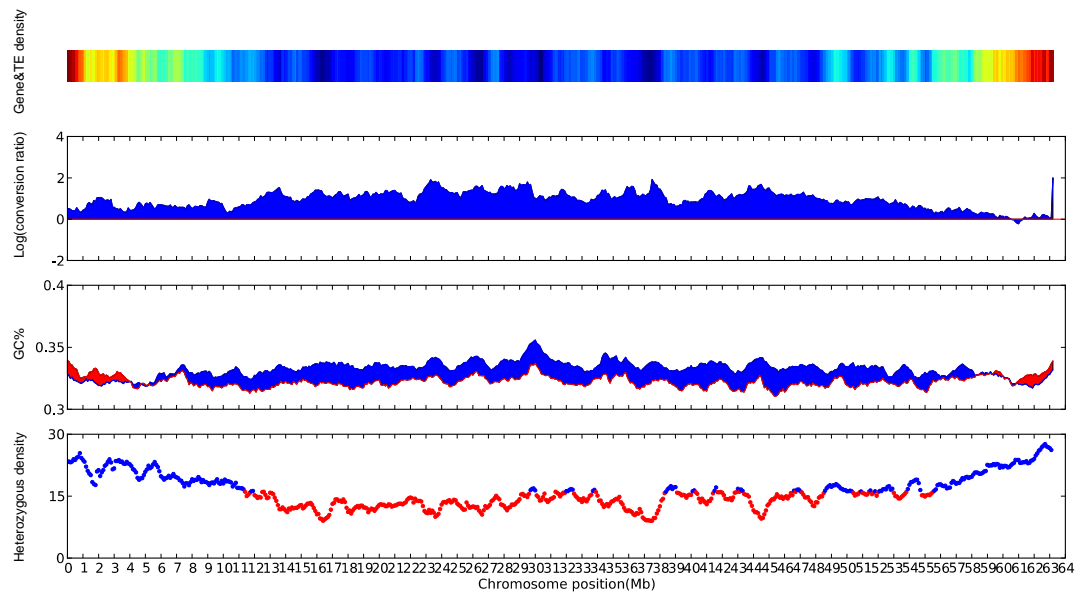

Chr6

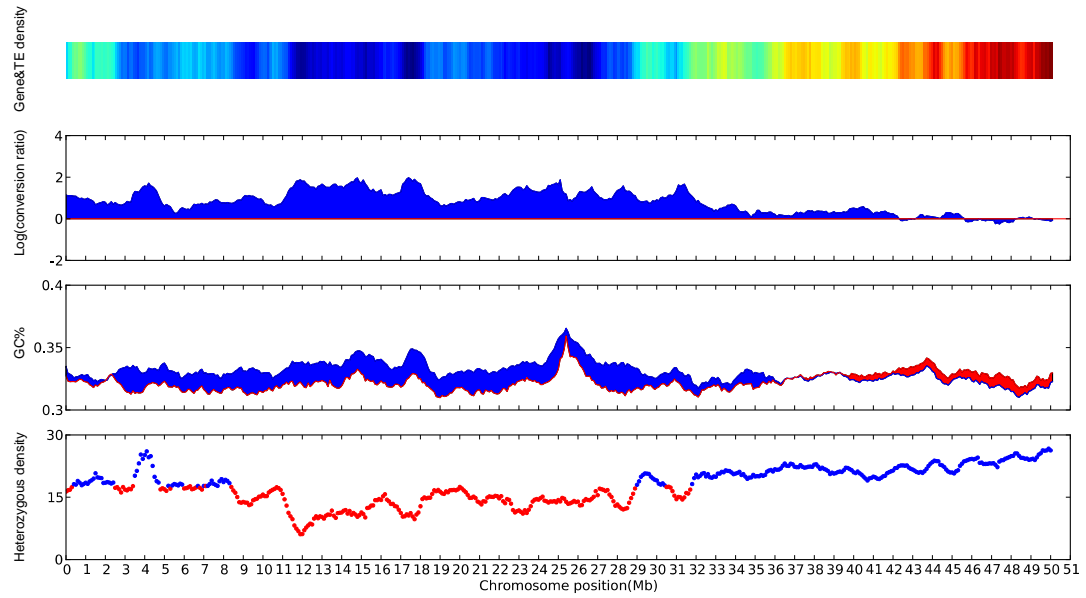

Chr7

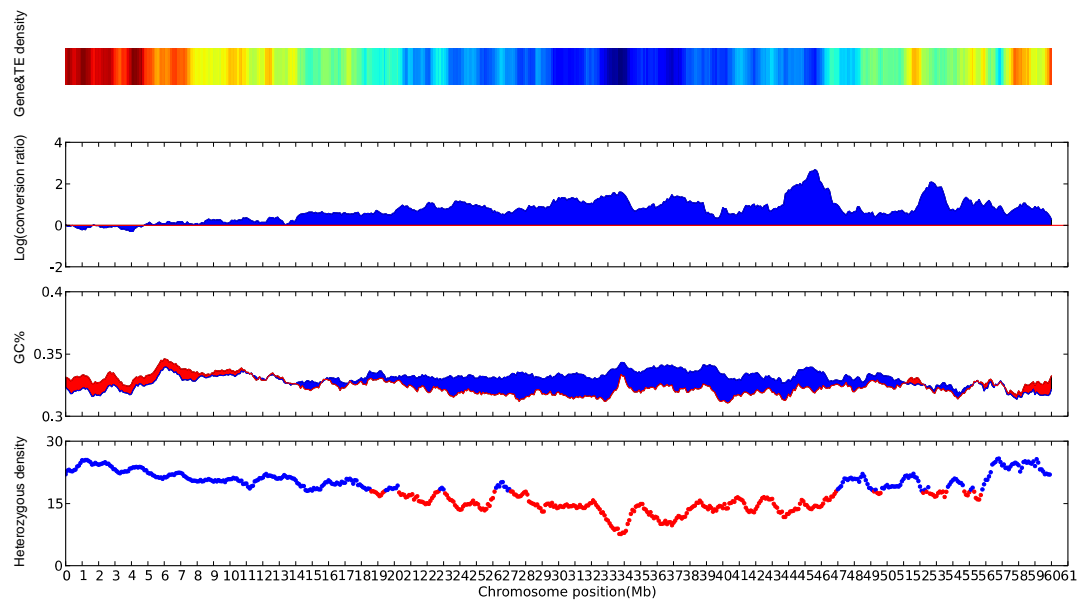

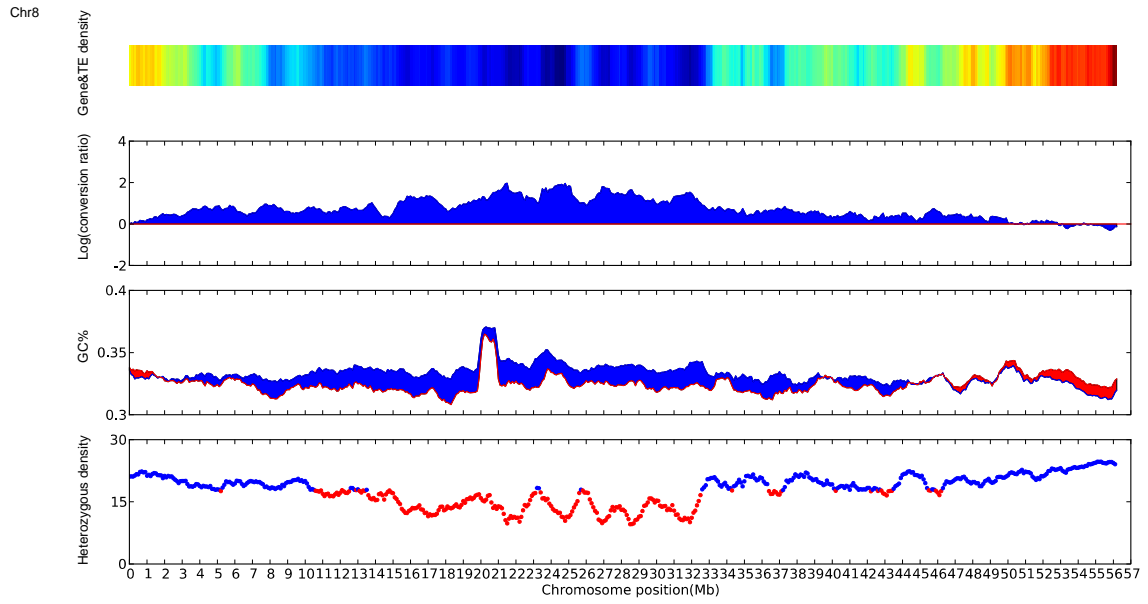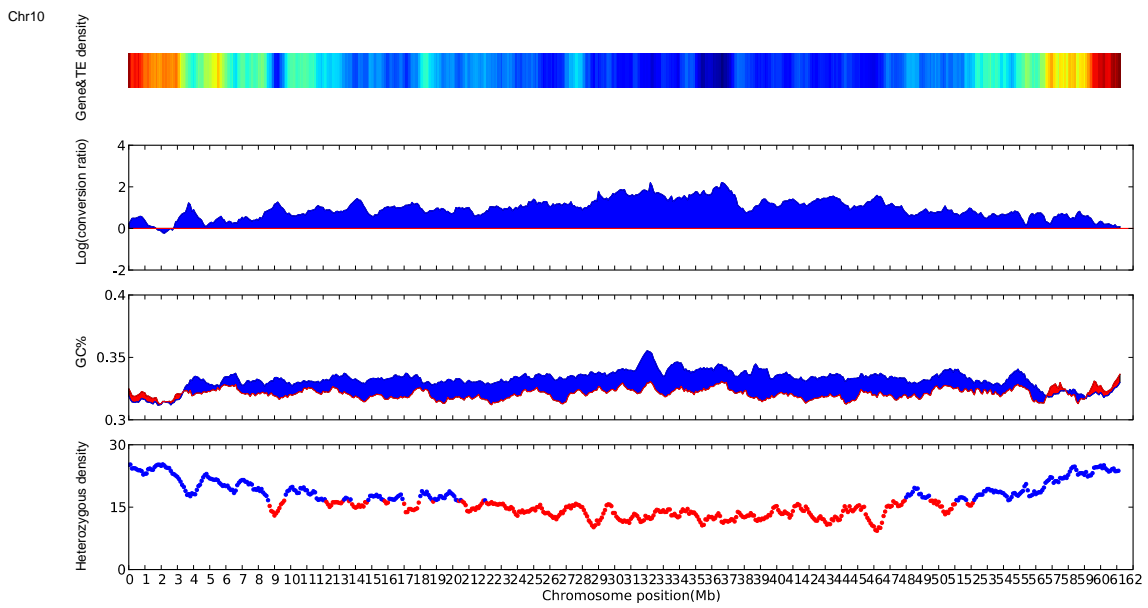

Chr11

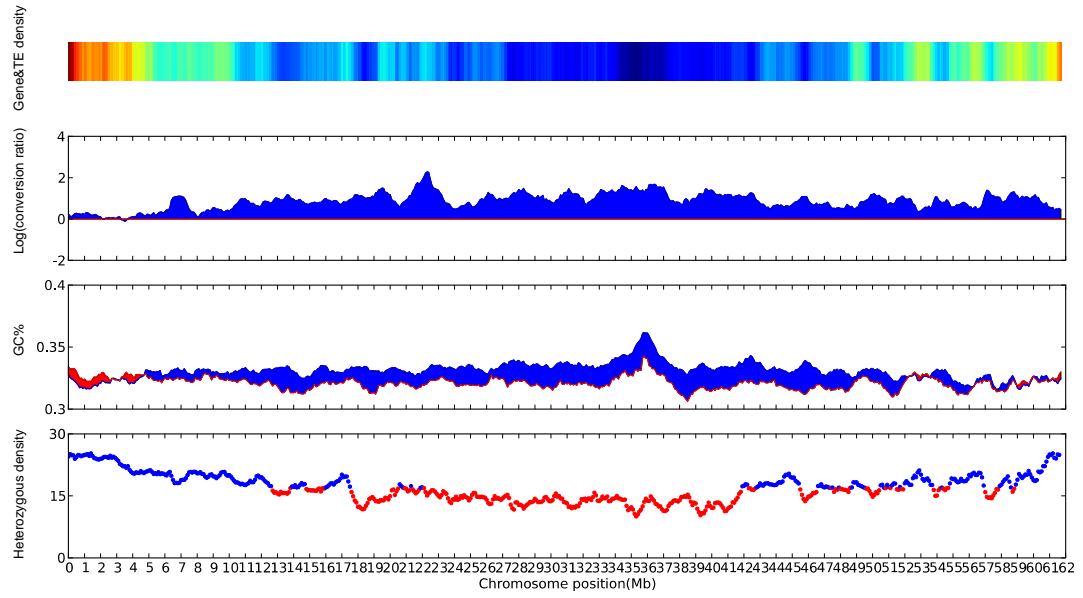

Chr12

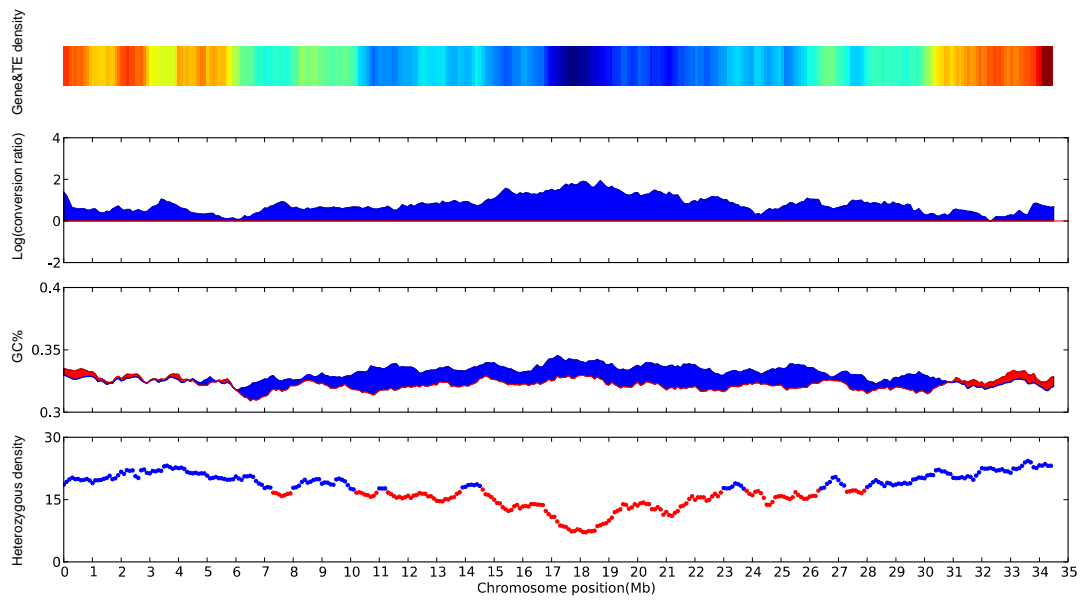

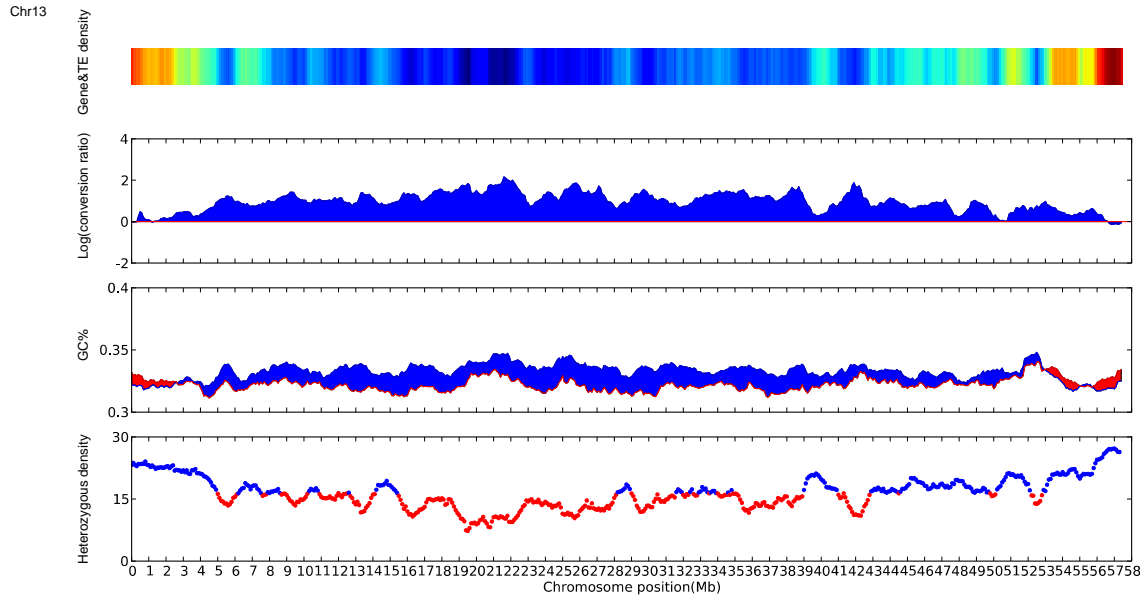

**Figure S3** Genome distribution of biased conversion, heterozygosity and GC-content. See Fig. 2 for detailed legend.



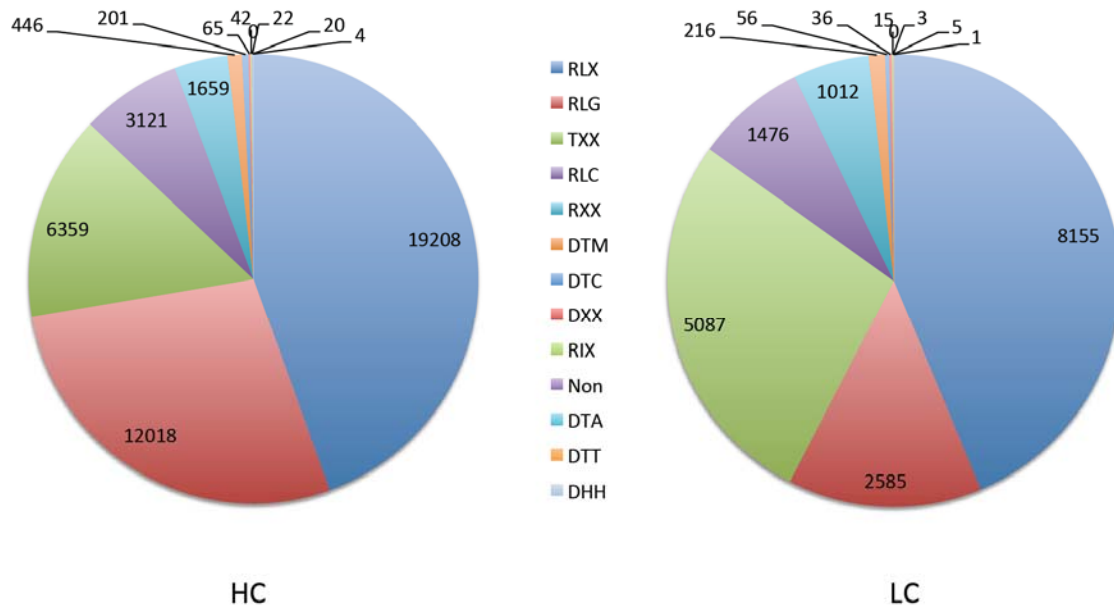

**Figure S4** Number of each transposon types in HC and LC. Transposon types are: RLX, LTR-retrotransposon; RLG, Gypsy; TXX, transposon (either transposon or retrotransposon); RLC, Copia; RXX, retrotransposons; DTM, mutator; DTC, CACTA; DXX, DNA transposons; RIX, LINE; Non, others; DTA, hAT; DTT, Tc1-Mariner; DHH, Helitron.

|                                | HC       |          | LC        |           |
|--------------------------------|----------|----------|-----------|-----------|
|                                | At -> Dt | Dt -> At | At -> Dt  | Dt -> At  |
| Polyploidization to speciation | 735/472  | 338/263  | 1473/1116 | 1779/1733 |
| Speciation to domestication    | 48/48    | 10/7     | 37/47     | 37/53     |
| Domestication to improvement   | 12/1     | 8/5      | 11/17     | 12/12     |
| Improvement to present         | 4/2      | 0/0      | 2/2       | 4/8       |

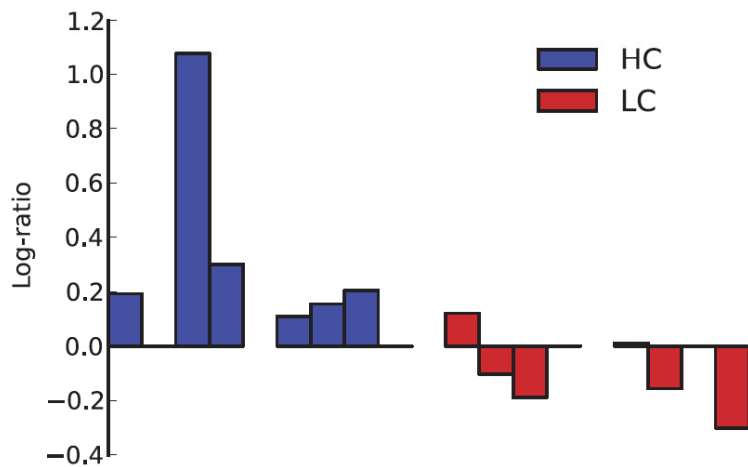

**Figure S5** Phylogenetic distribution of the ratio of non-synonymous to synonymous conversions. Barplot shows logarithm of the ratio for each cell in the above table.

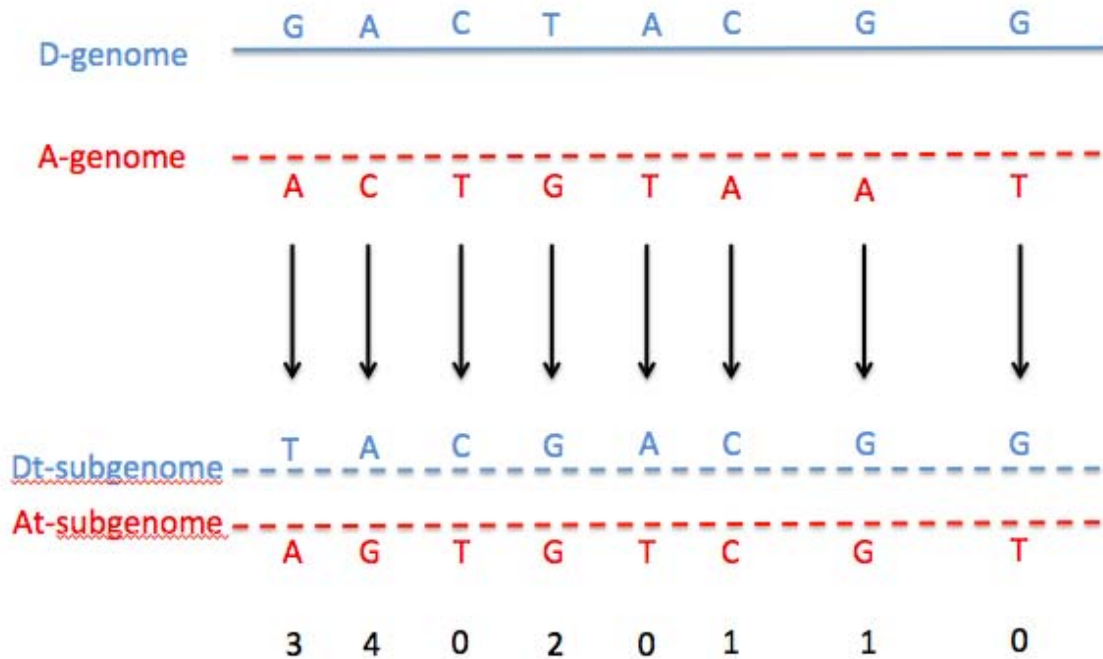

**Figure S6** Identification of converted alleles. A-genome and D-genome are diploid progenitor genomes. At- and Dt-subgenome are tetraploid genomes with At-genome derived from A-genome and Dt-genome derived from D-genome. Solid line represents cotton reference genome and broken line indicates re-sequenced genomes. Sites with number “0” represents no allele changes in the tetraploid genomes, likewise, “1”: At to Dt conversion; “2”: Dt to At conversion; “3”: Dt mutation; “4”: At mutation.

A

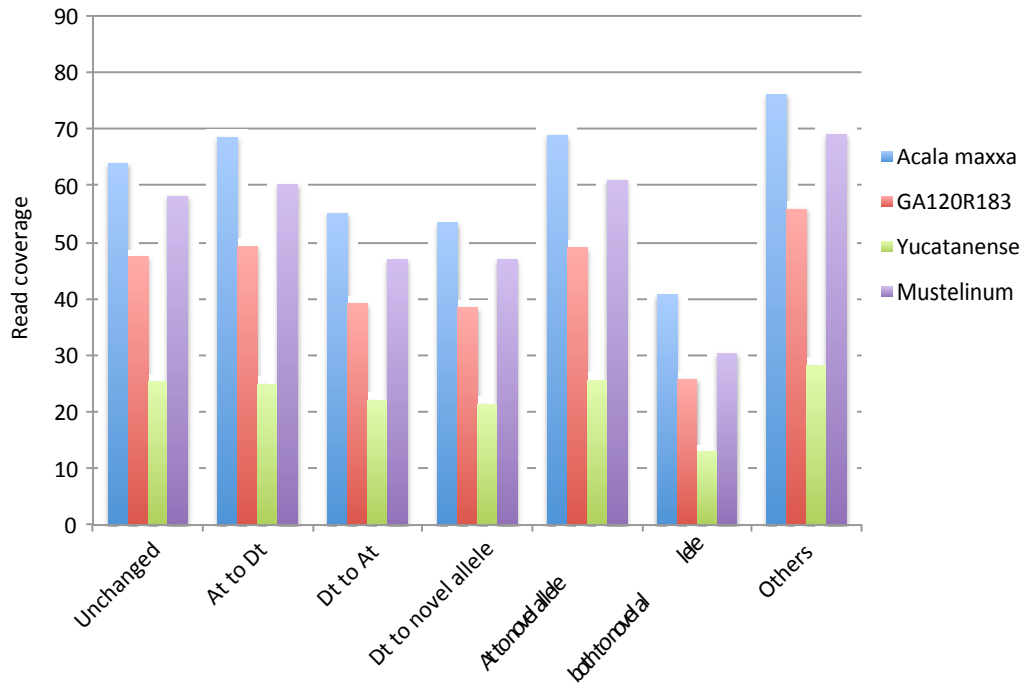

B

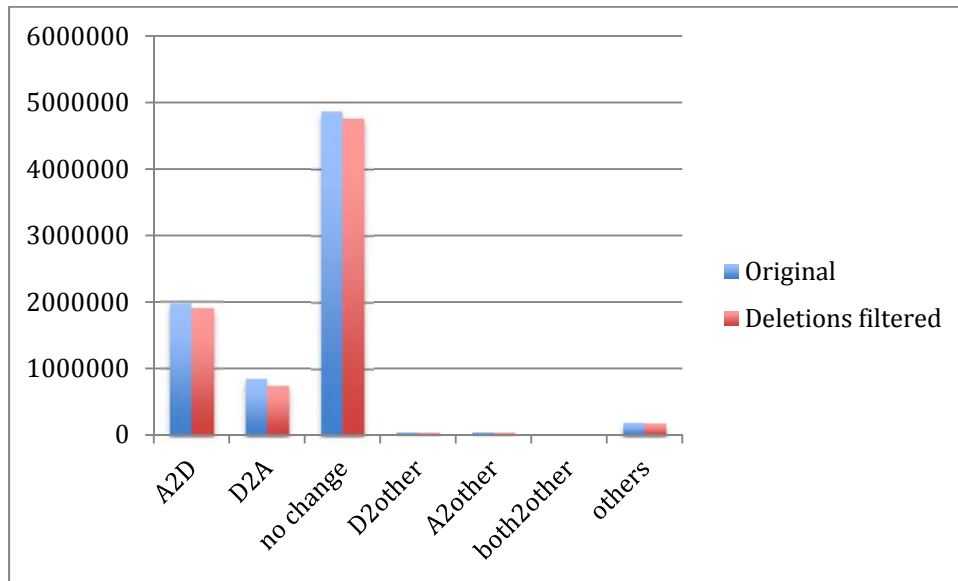

C

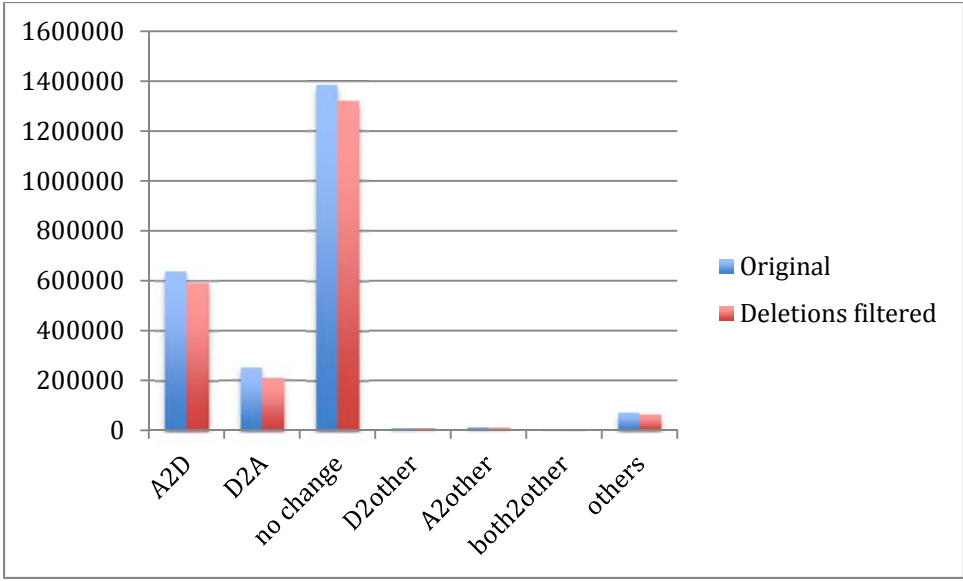

D

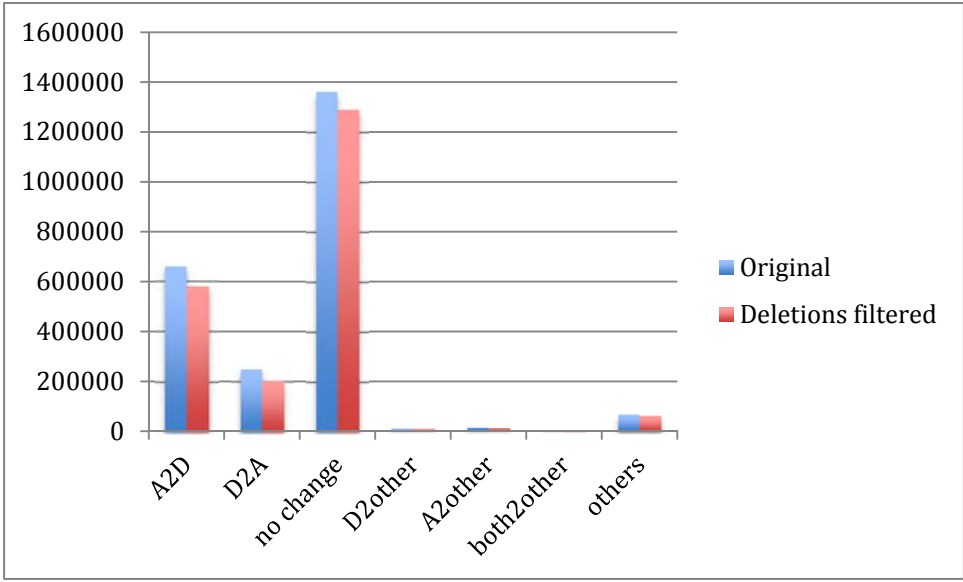

E

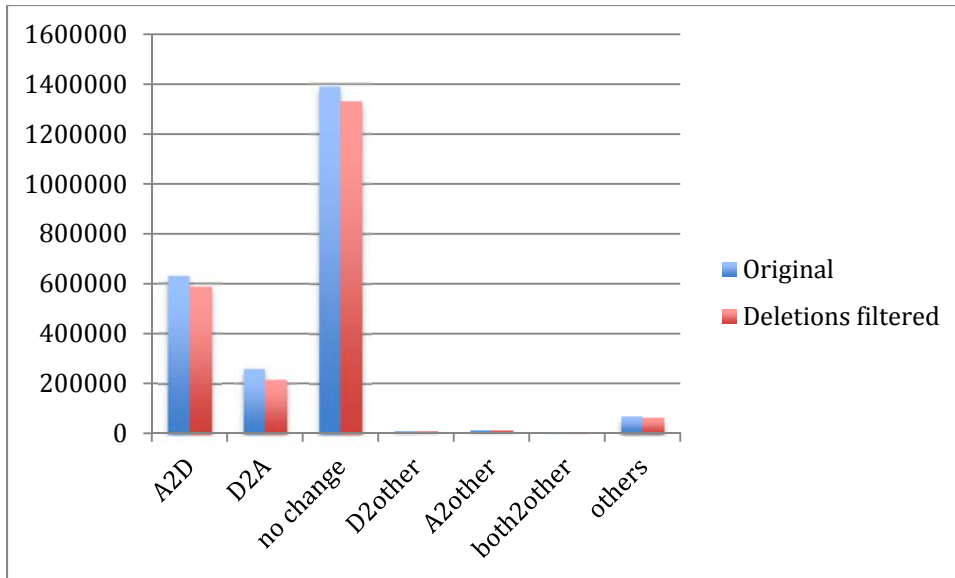

**Figure S7** (A) Average mapped read coverage for different mutation categories in four cotton species. (B-E) Effects of deletion. Blue bar shows number of sites in each mutation category. Red bar shows number of sites after removal of the ones with reads coverage less than or equal to half of the average read coverage of each chromosome. (B) *Acala Maxxa*, (C) *GA120R183*, (D) *Yucatanense*, (E) *G. mustelinum*

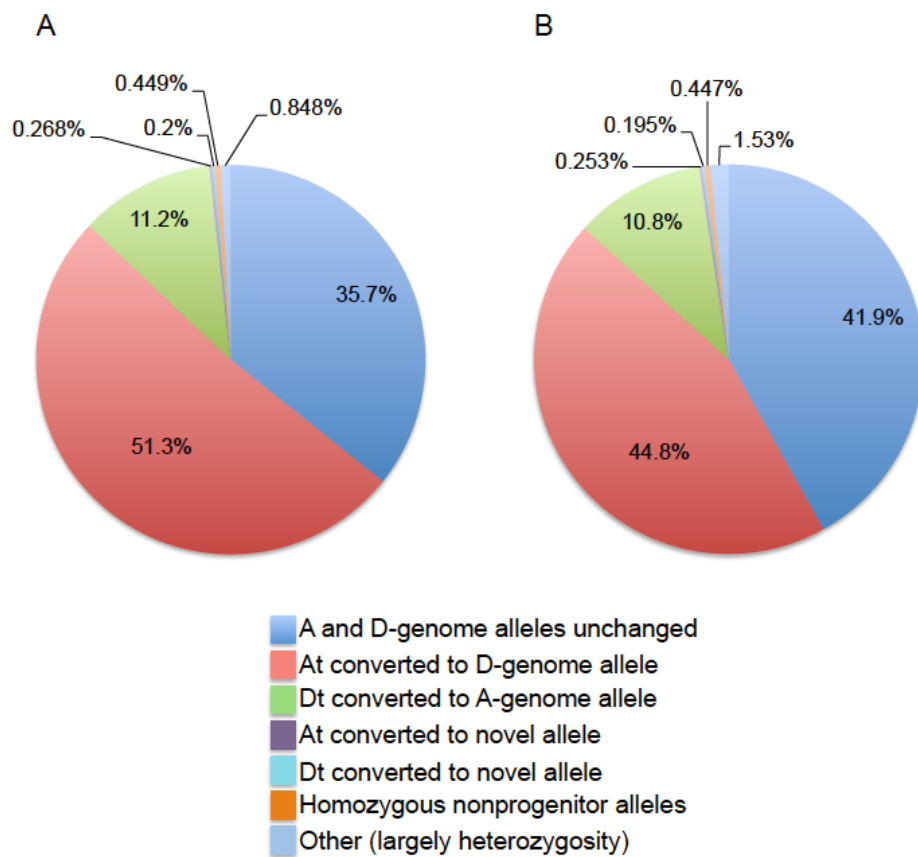

**Figure S8** Allelic changes in polyploidy cotton using relaxed read editing distance (0.8). (A) Allelic changes with all other parameters unchanged. (B) Allelic changes with reduced frequency threshold to call heterozygous genotype.

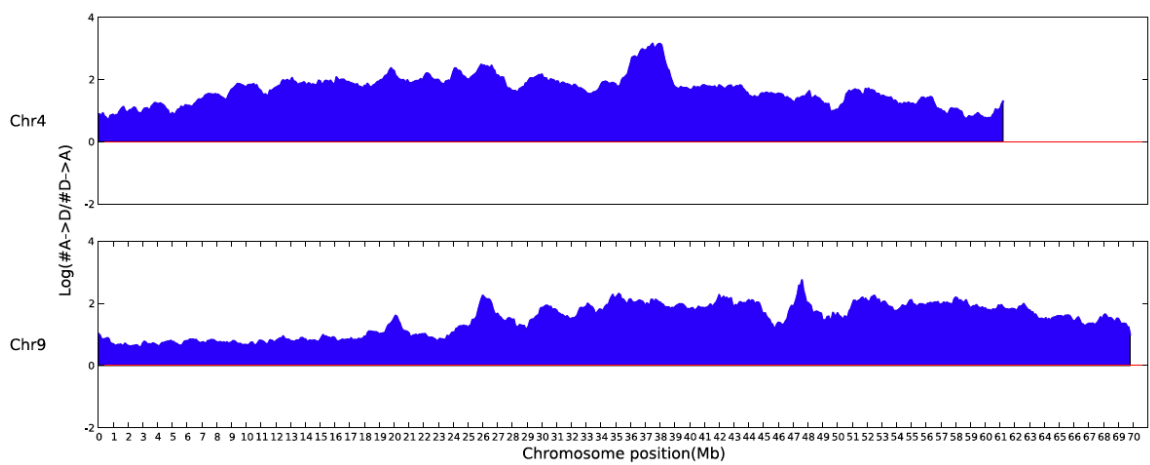

**Figure S9** Genome distribution of conversion bias using relaxed read editing distance (0.8).



A

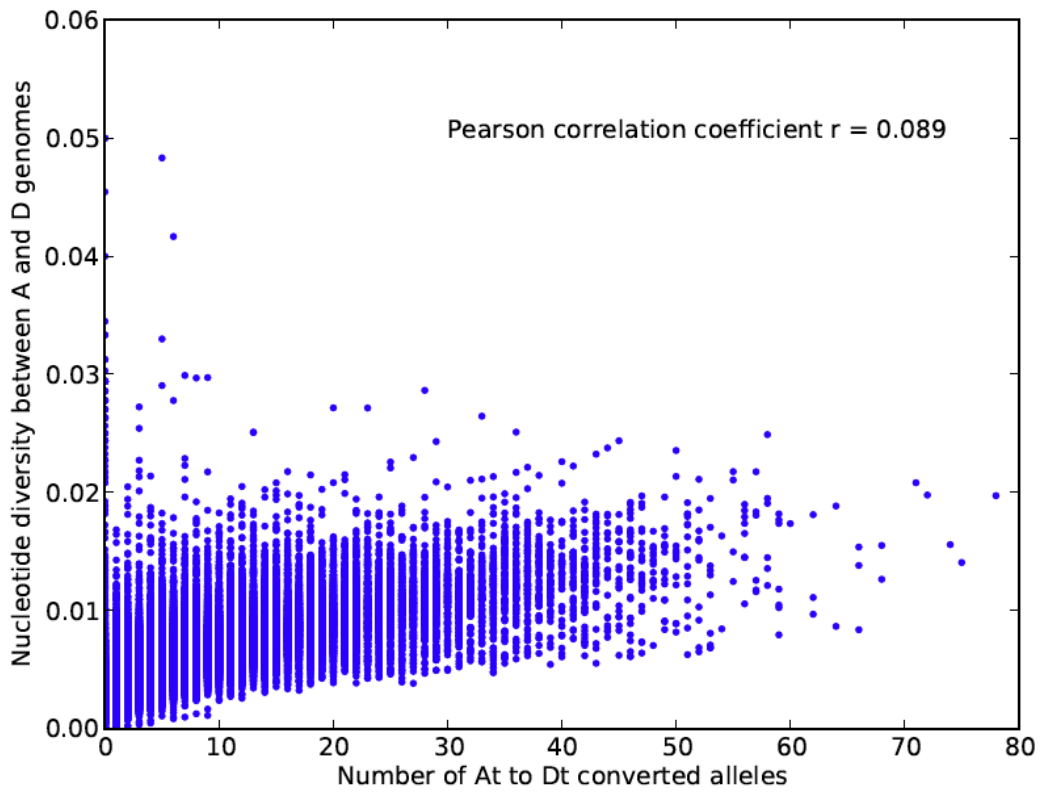

B

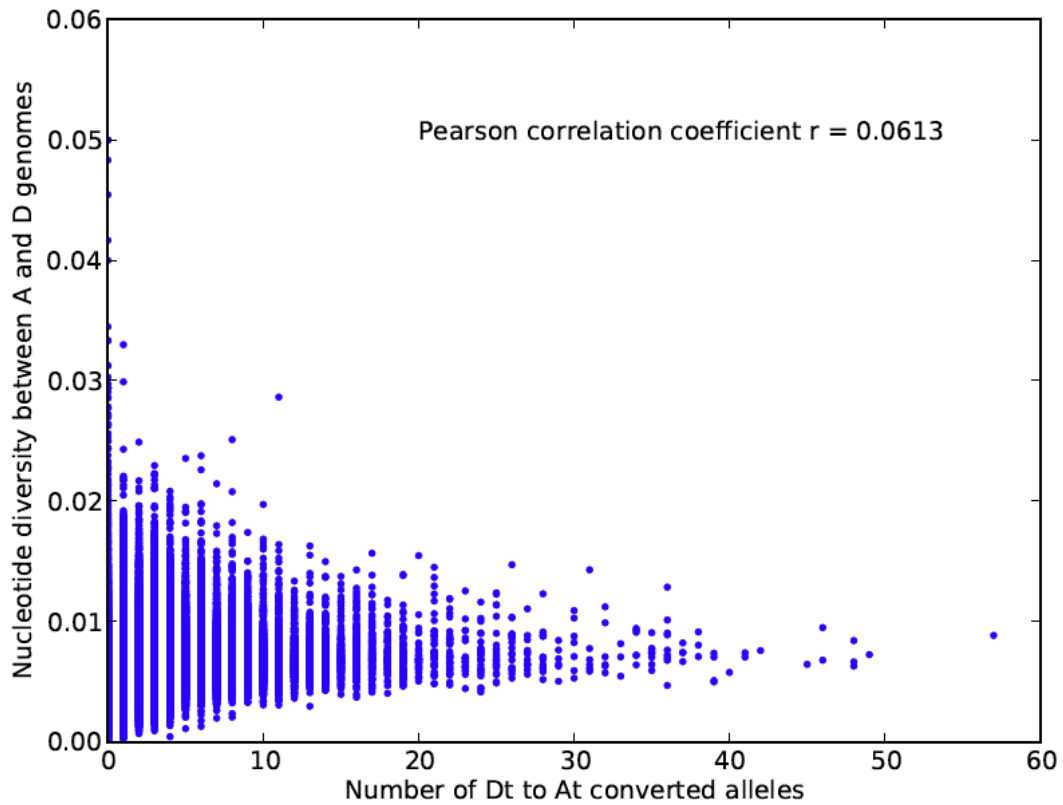

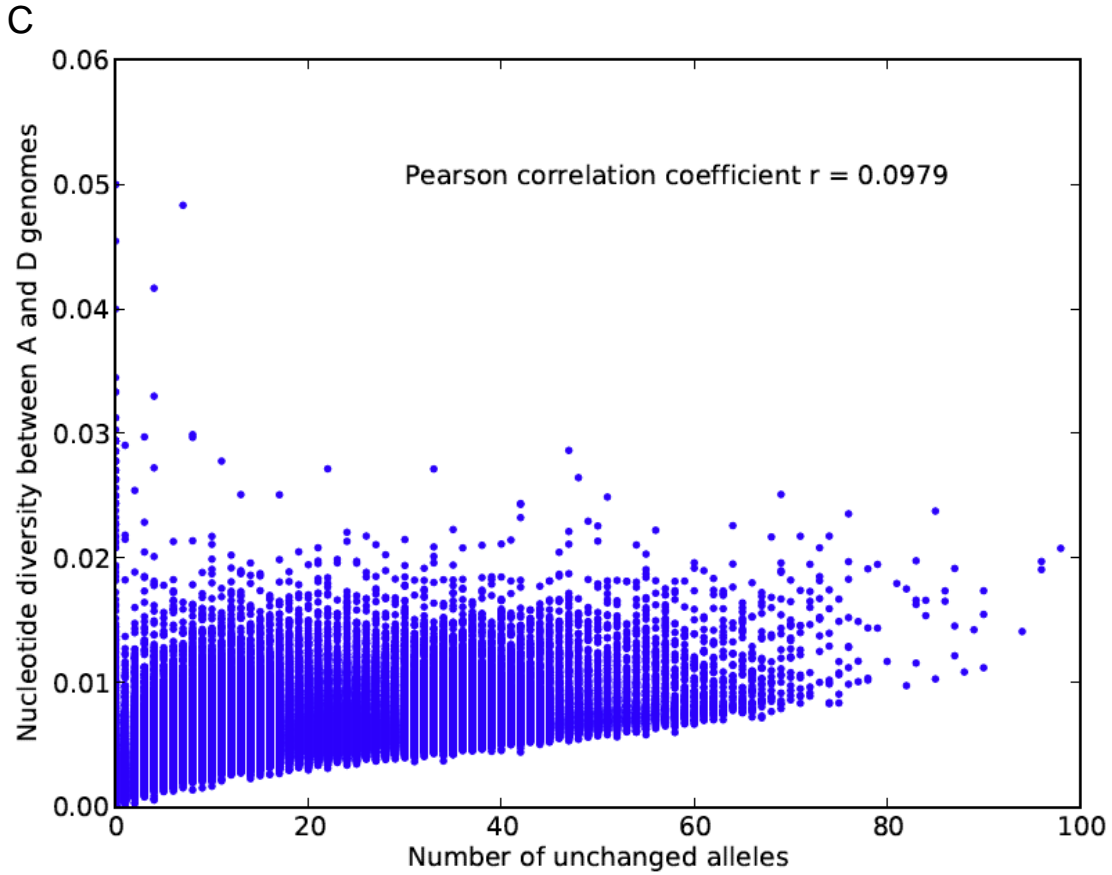

**Figure S10** Correlation between number of allele changes and nucleotide divergence between A and D genomes. Genome is divided into non-overlap 10Kb bins. For each bins, the number of At to Dt converted alleles and the nucleotide divergence between the A and D genomes are calculated. (A) The number of At to Dt conversions and nucleotide divergence between A and D genomes. (B) The number of Dt to At conversions and nucleotide divergence between A and D genomes. (C) The number of unchanged alleles and nucleotide divergence between A and D genomes.

**Table S1** is available for download as an Excel file at  
<http://www.genetics.org/lookup/suppl/doi:10.1534/genetics.114.166124/-/DC1>.
