# Supplementary material
Source: PubMed Central journal article supplement (PMC4125390)
Supplement: 60c851d2ad79b2bee750466b27862b63_genetics.114.166124-3.pdf [file 60c851d2ad79b2bee750466b27862b63_genetics.114.166124-3.pdf]

A

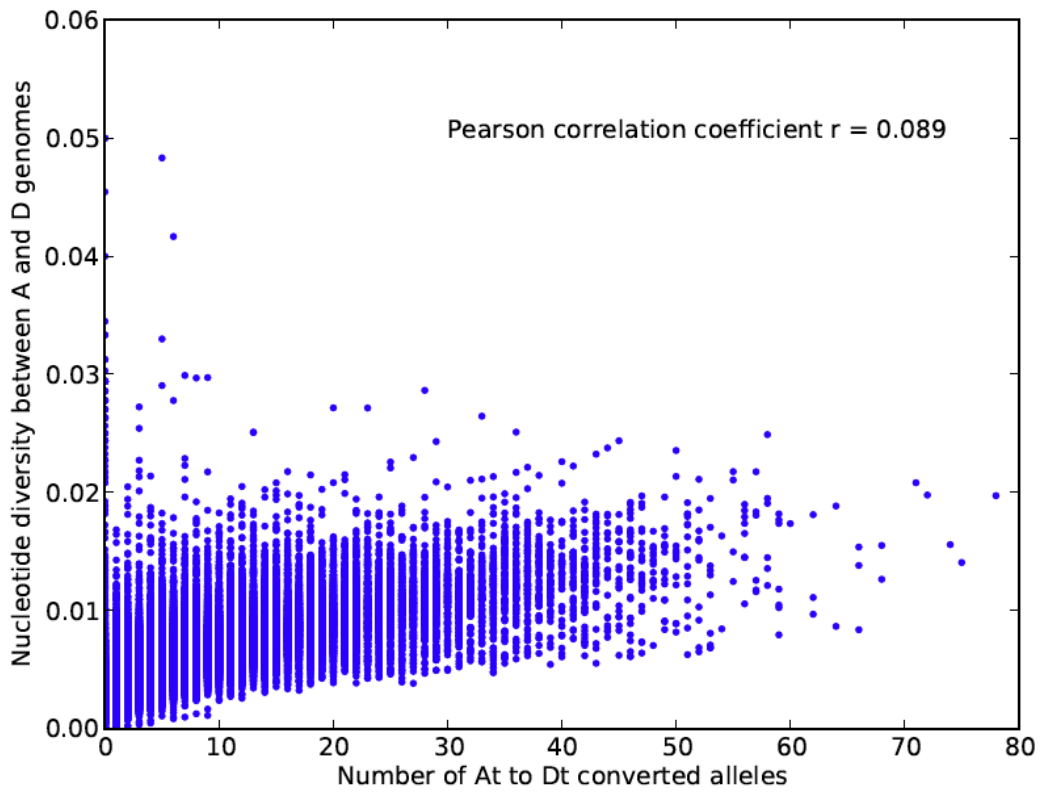

B

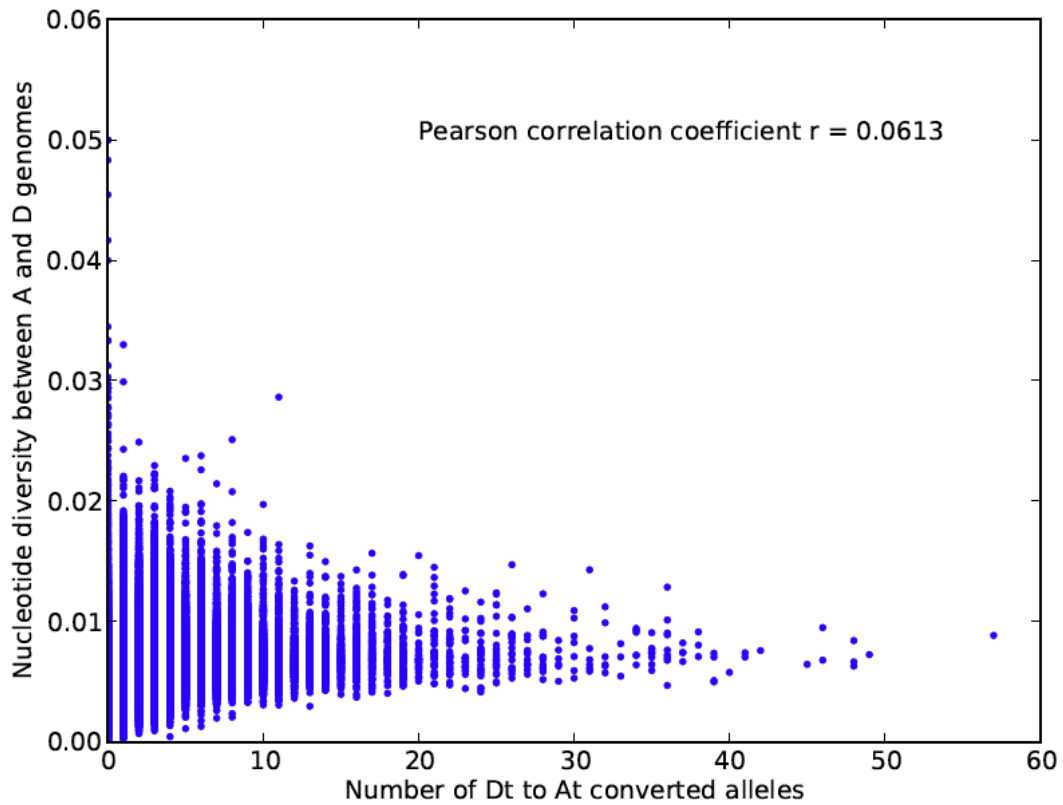

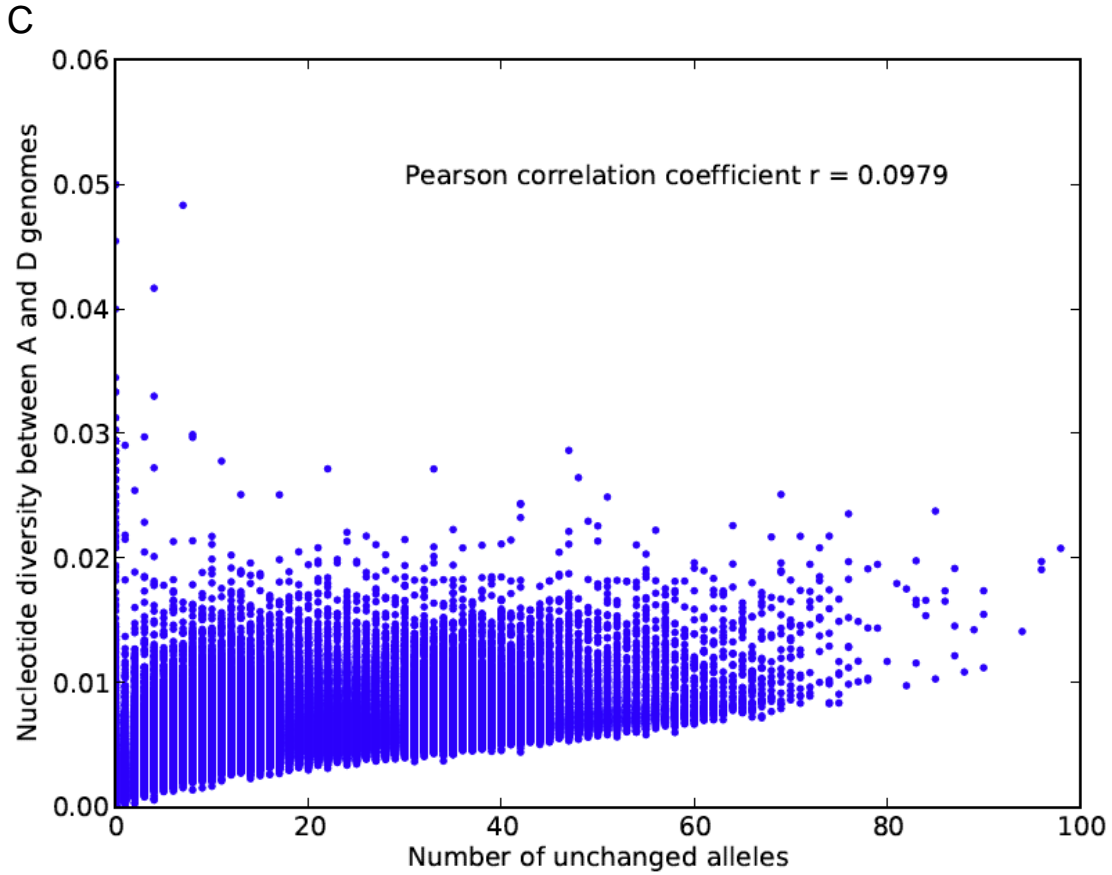

**Figure S10** Correlation between number of allele changes and nucleotide divergence between A and D genomes. Genome is divided into non-overlap 10Kb bins. For each bins, the number of At to Dt converted alleles and the nucleotide divergence between the A and D genomes are calculated. (A) The number of At to Dt conversions and nucleotide divergence between A and D genomes. (B) The number of Dt to At conversions and nucleotide divergence between A and D genomes. (C) The number of unchanged alleles and nucleotide divergence between A and D genomes.
