# Supplementary material
Source: PubMed Central journal article supplement (PMC4125390)
Supplement: 84d3dc3903136b98c0d443e7724bbd58_genetics.114.166124-2.pdf [file 84d3dc3903136b98c0d443e7724bbd58_genetics.114.166124-2.pdf]

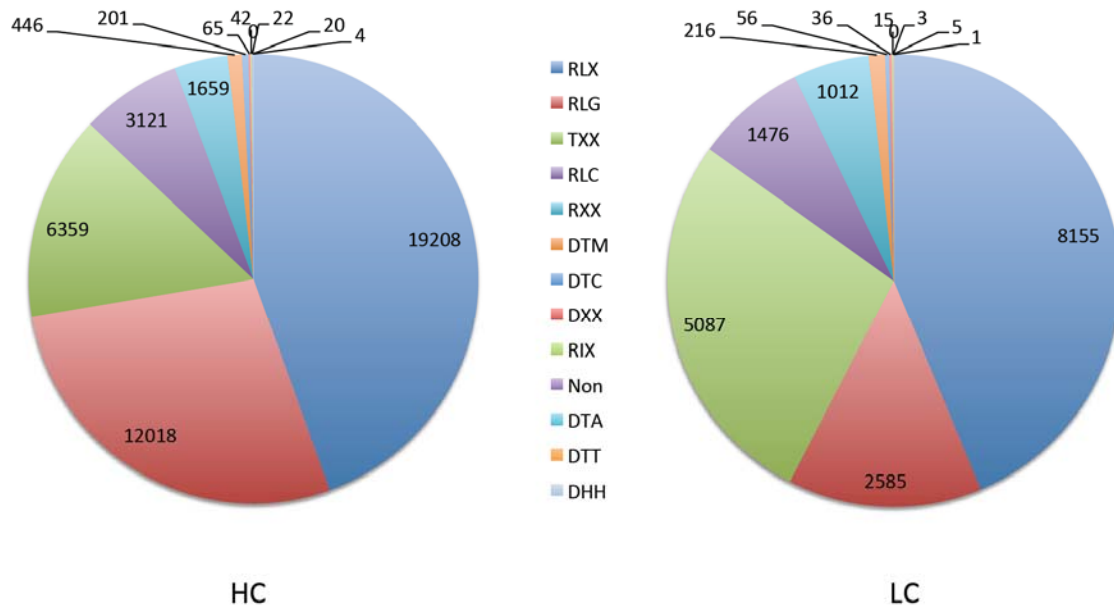

**Figure S4** Number of each transposon types in HC and LC. Transposon types are: RLX, LTR-retrotransposon; RLG, Gypsy; TXX, transposon (either transposon or retrotransposon); RLC, Copia; RXX, retrotransposons; DTM, mutator; DTC, CACTA; DXX, DNA transposons; RIX, LINE; Non, others; DTA, hAT; DTT, Tc1-Mariner; DHH, Helitron.
