# Supplementary material
Source: PubMed Central journal article supplement (PMC4125390)
Supplement: 322d238d625c01f9abc59c3179897031_genetics.114.166124-6.pdf [file 322d238d625c01f9abc59c3179897031_genetics.114.166124-6.pdf]

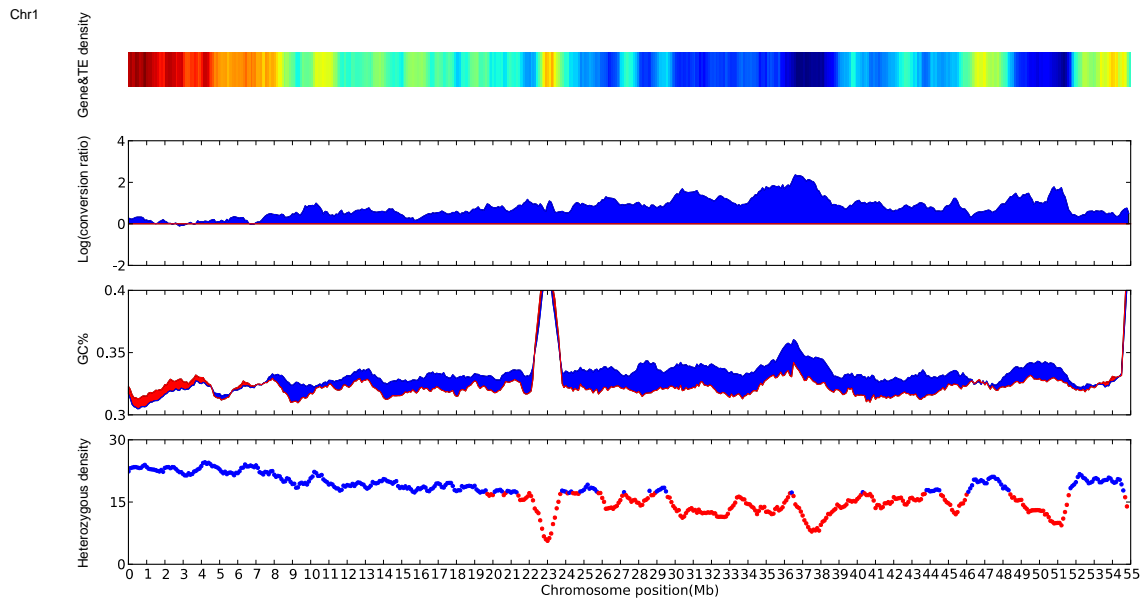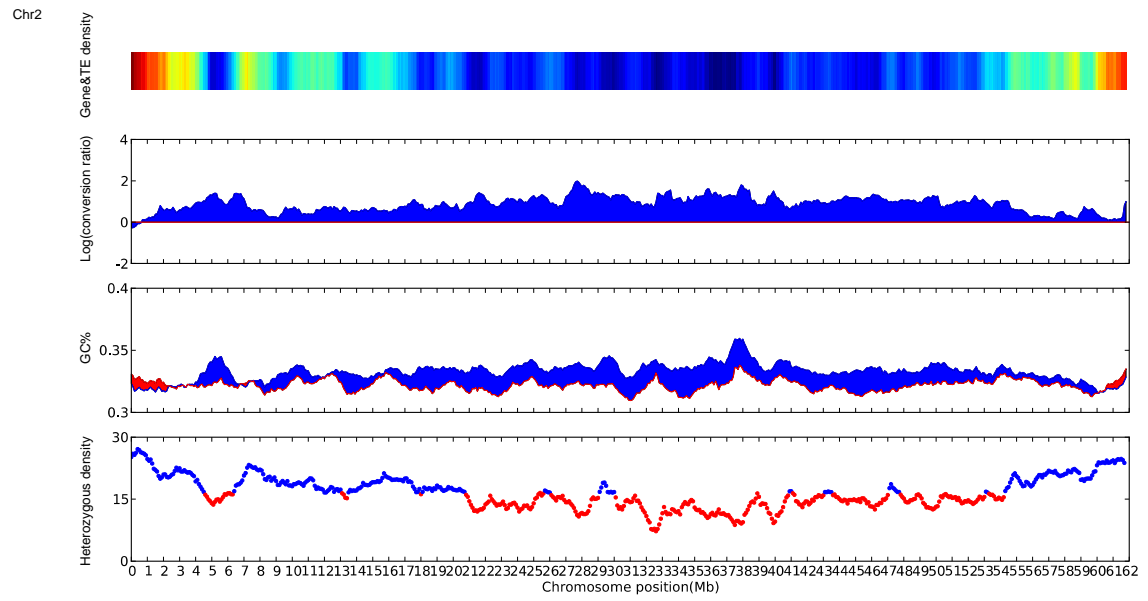

Chr3

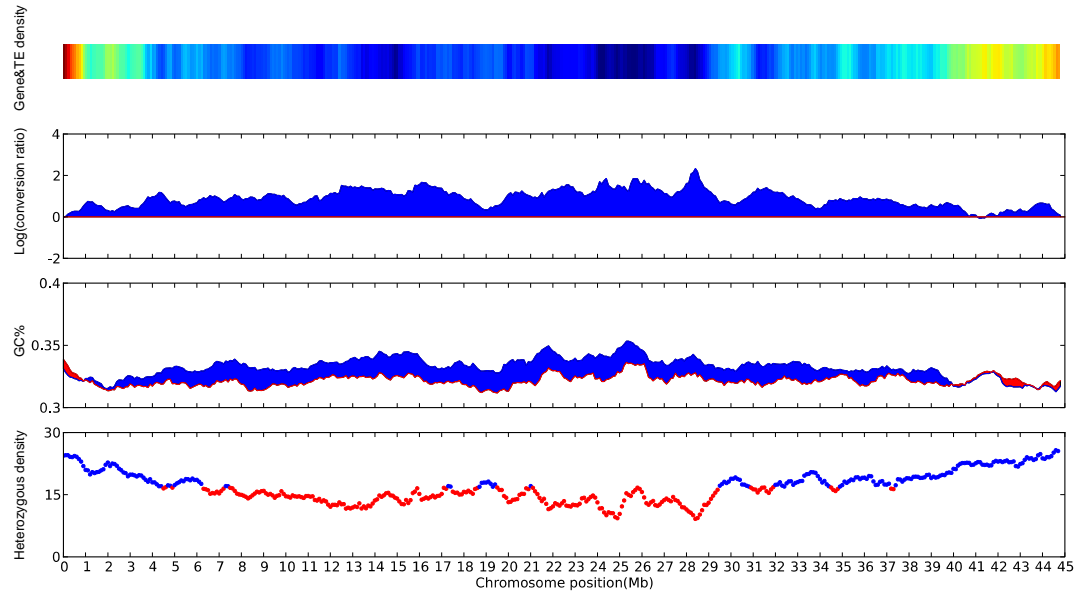

Chr5

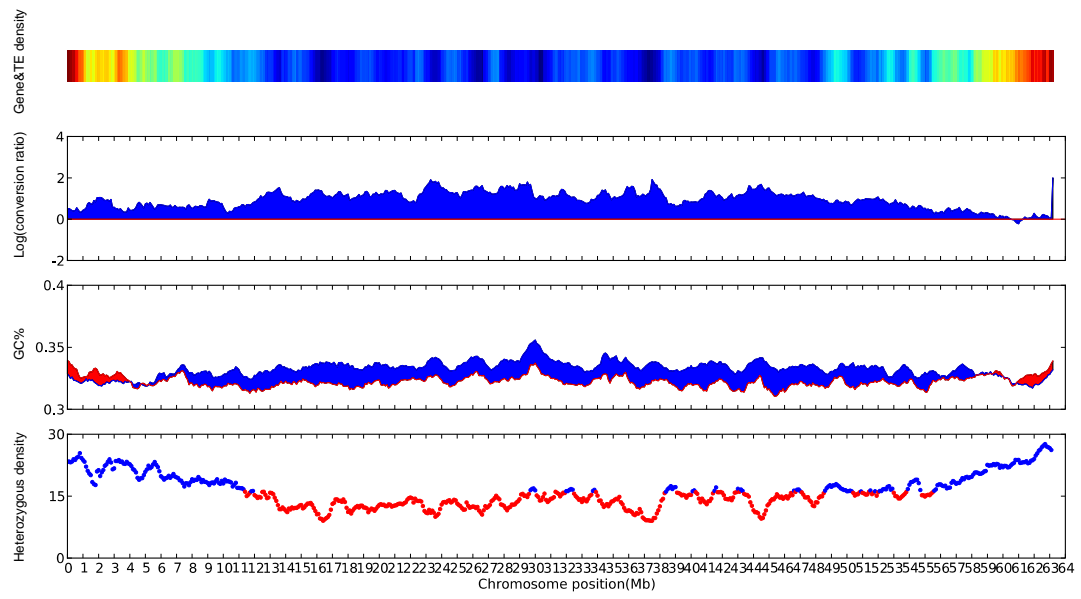

Chr6

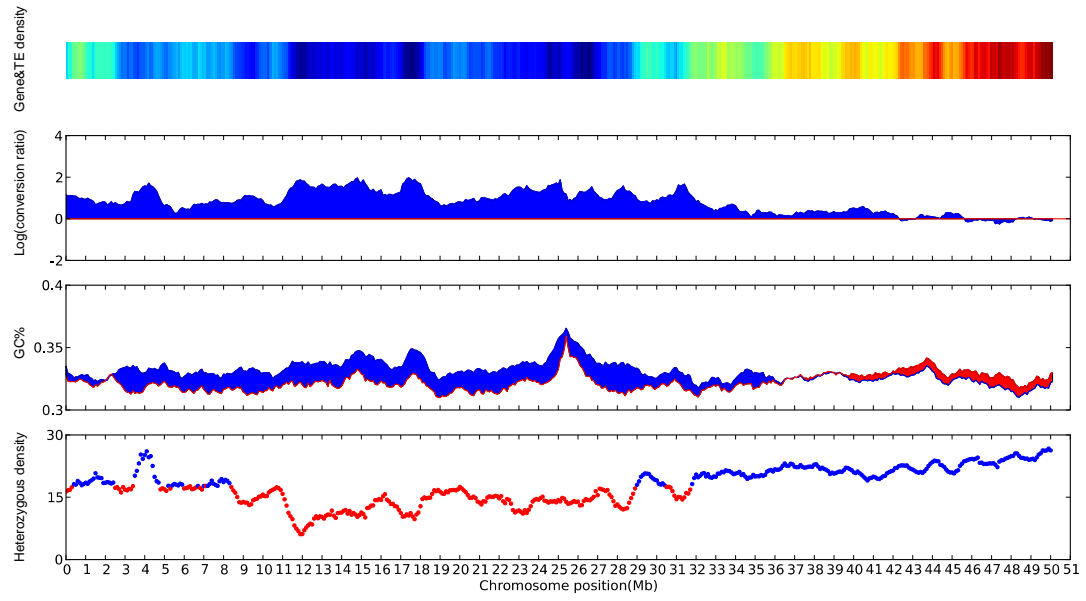

Chr7

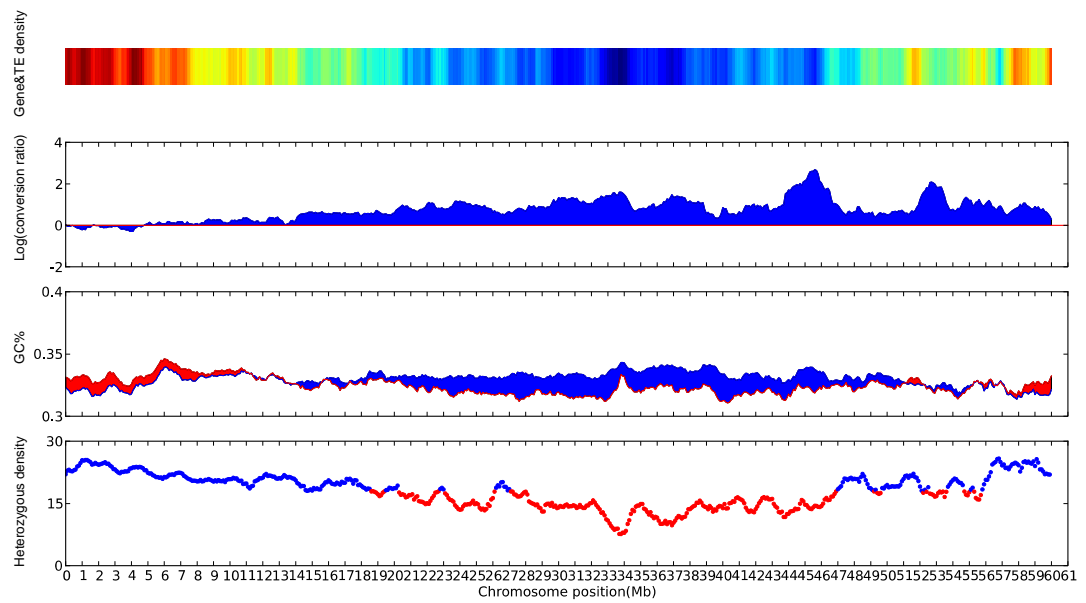

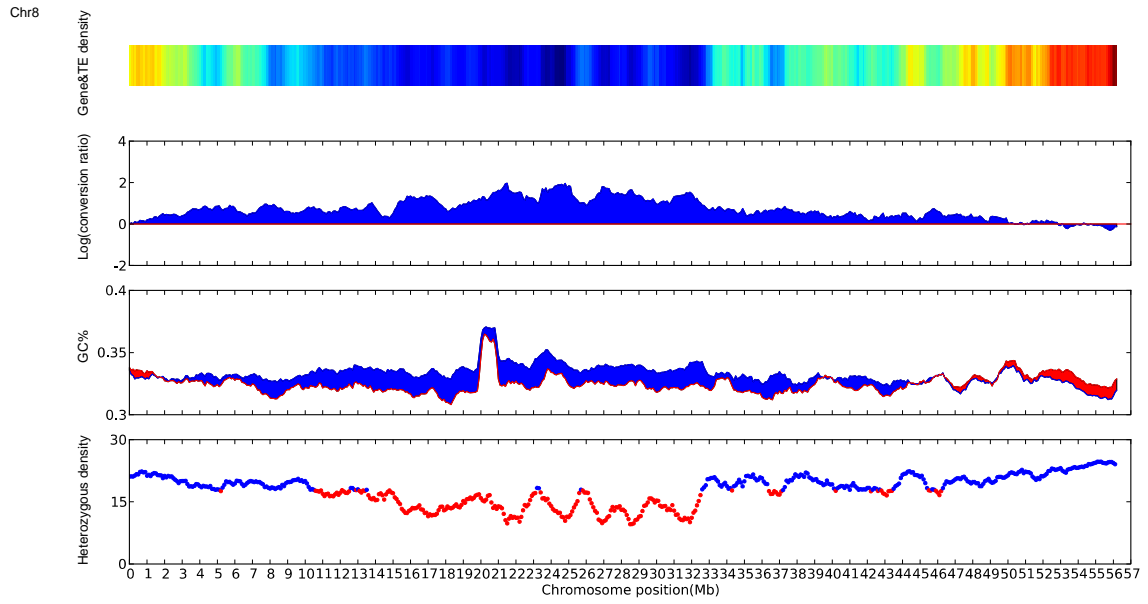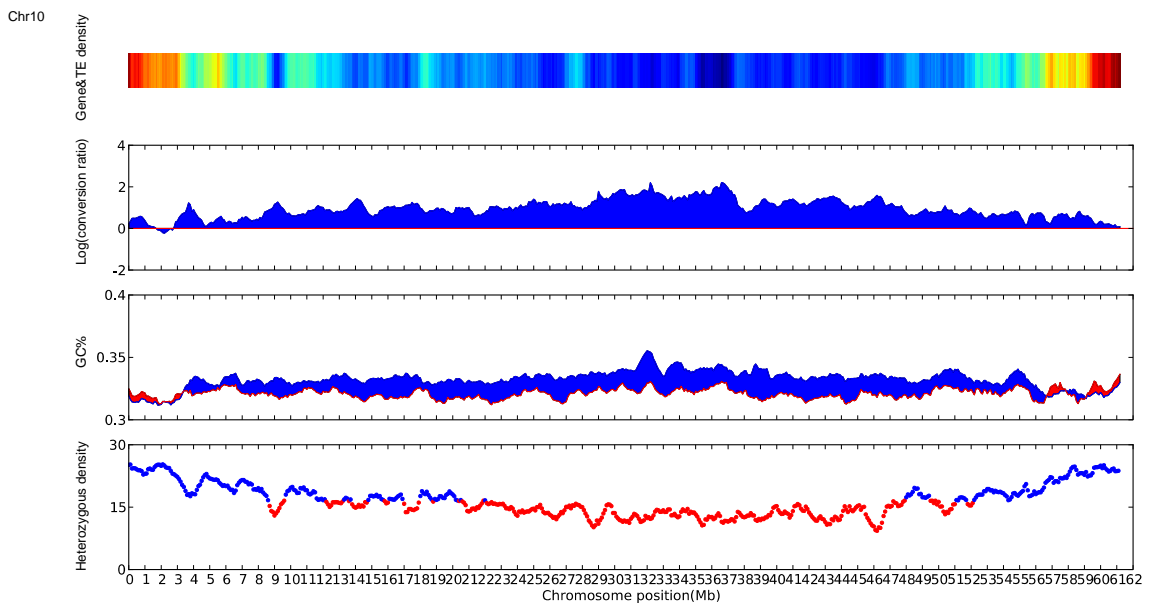

Chr11

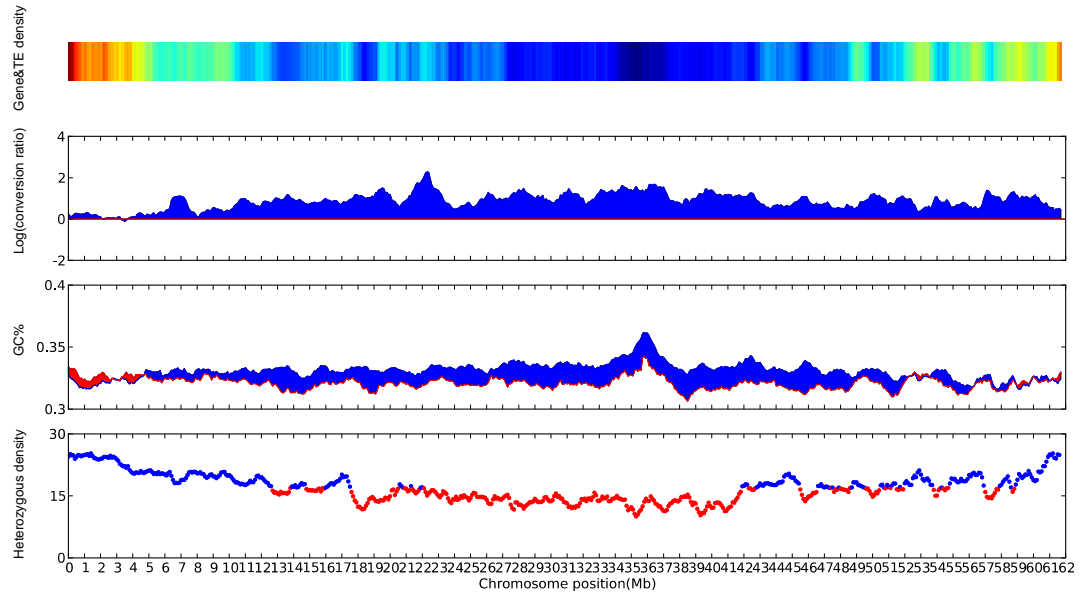

Chr12

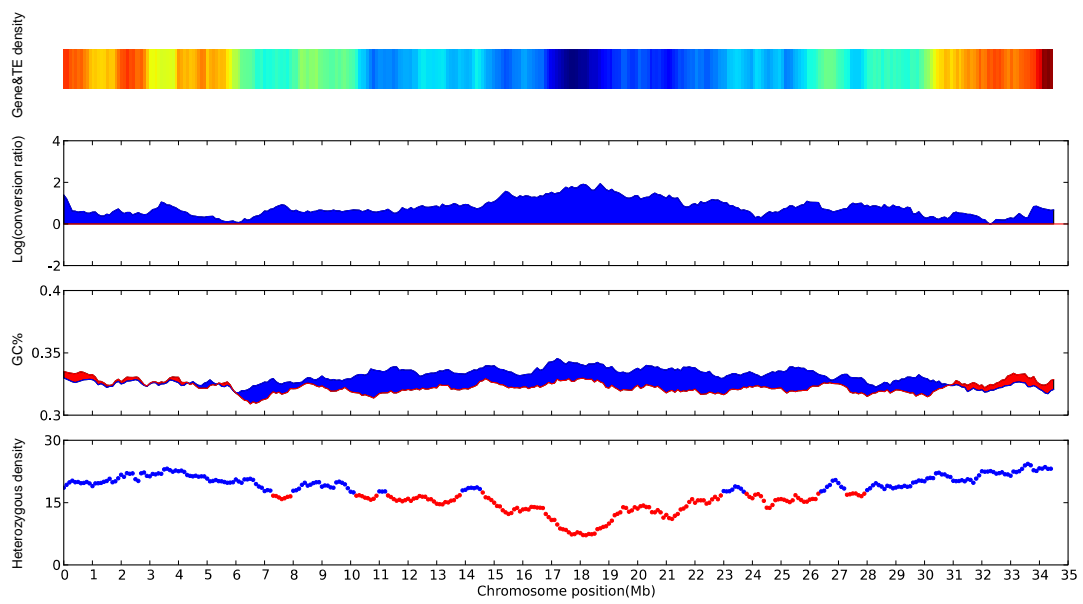

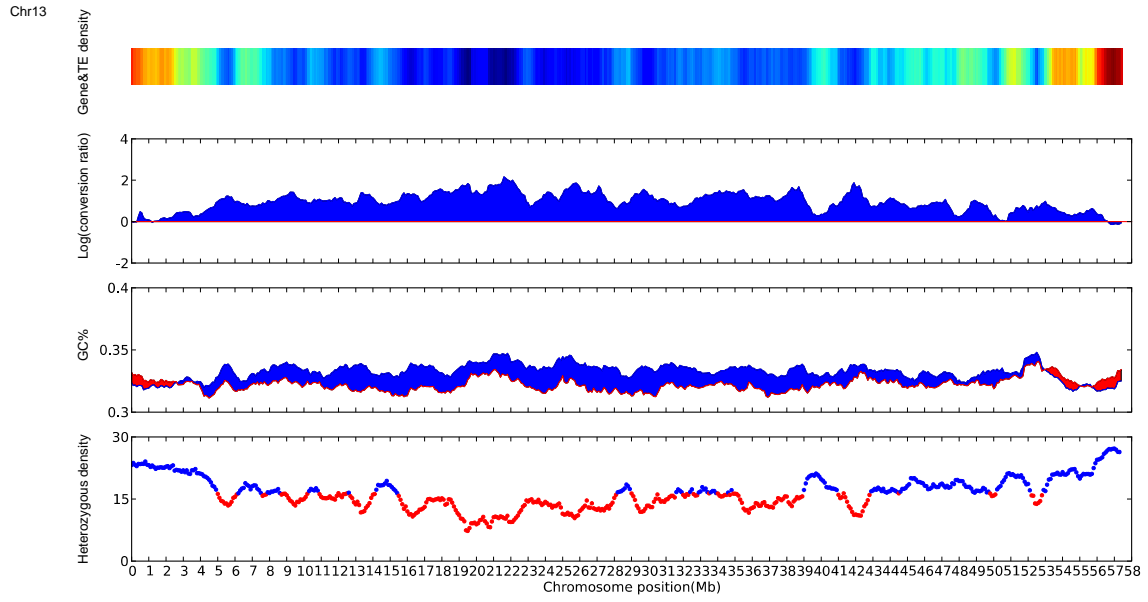

**Figure S3** Genome distribution of biased conversion, heterozygosity and GC-content. See Fig. 2 for detailed legend.
