# Supplementary material
Source: PubMed Central journal article supplement (PMC4125390)
Supplement: dc178ae7c7fdb1a507086bb68f942938_genetics.114.166124-7.pdf [file dc178ae7c7fdb1a507086bb68f942938_genetics.114.166124-7.pdf]

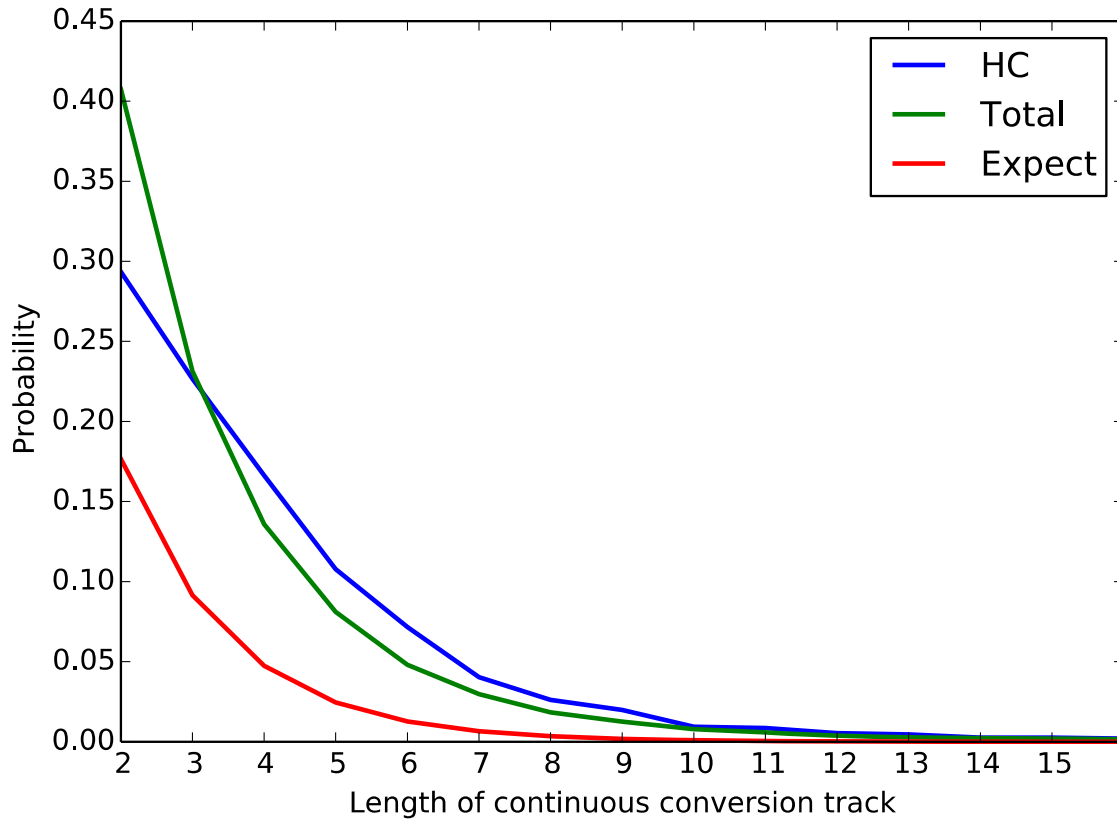

**Figure S2** Frequency distribution of the length of conversion tracks measured by number of continuous converted alleles. Red line is expected distribution (exponential) of the length of continuous random mutations. Green line is the distribution of total number of conversions in the genome. Blue line is the distribution of conversions in HC.
