# Supplementary material
Source: PubMed Central journal article supplement (PMC4125390)
Supplement: e4bacd418d9b79066bb2d72d7fbb4a77_genetics.114.166124-11.pdf [file e4bacd418d9b79066bb2d72d7fbb4a77_genetics.114.166124-11.pdf]

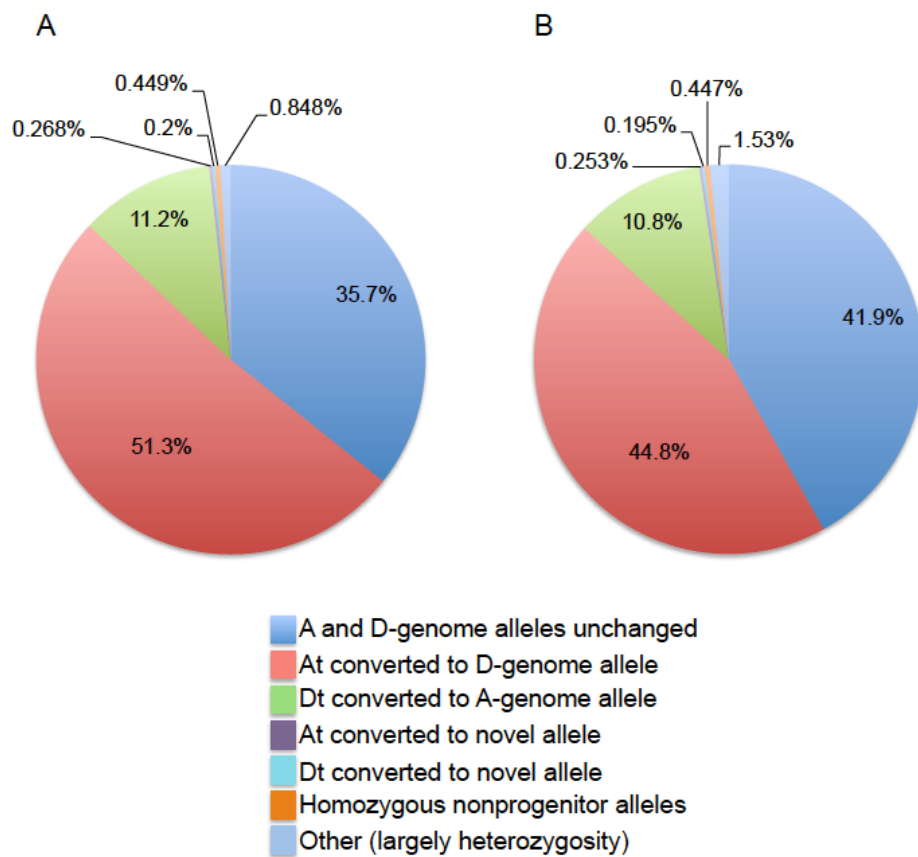

**Figure S8** Allelic changes in polyploidy cotton using relaxed read editing distance (0.8). (A) Allelic changes with all other parameters unchanged. (B) Allelic changes with reduced frequency threshold to call heterozygous genotype.
