# Supplementary material
Source: PubMed Central journal article supplement (PMC4125390)
Supplement: f5c8d97d8acd5954aeed5f9918cb568b_genetics.114.166124-9.pdf [file f5c8d97d8acd5954aeed5f9918cb568b_genetics.114.166124-9.pdf]

|                                | HC       |          | LC        |           |
|--------------------------------|----------|----------|-----------|-----------|
|                                | At -> Dt | Dt -> At | At -> Dt  | Dt -> At  |
| Polyploidization to speciation | 735/472  | 338/263  | 1473/1116 | 1779/1733 |
| Speciation to domestication    | 48/48    | 10/7     | 37/47     | 37/53     |
| Domestication to improvement   | 12/1     | 8/5      | 11/17     | 12/12     |
| Improvement to present         | 4/2      | 0/0      | 2/2       | 4/8       |

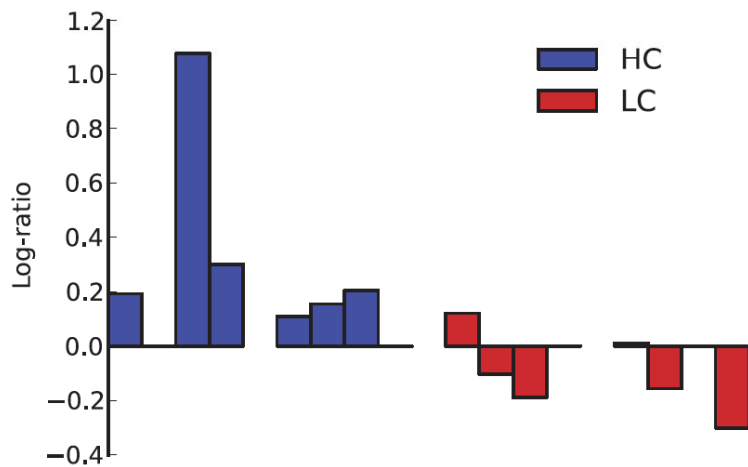

**Figure S5** Phylogenetic distribution of the ratio of non-synonymous to synonymous conversions. Barplot shows logarithm of the ratio for each cell in the above table.
