# Supplementary material
Source: PubMed Central journal article supplement (PMC4125390)

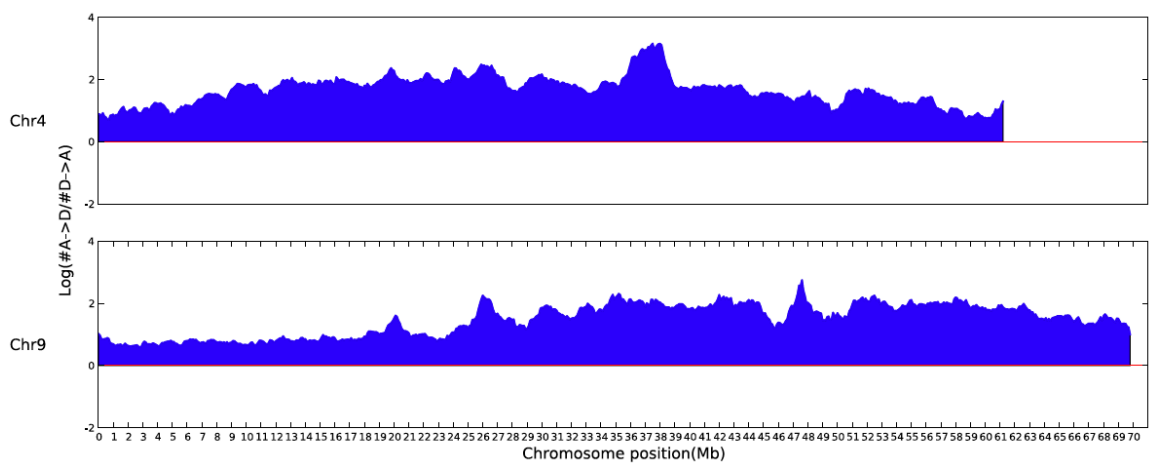

**Figure S9** Genome distribution of conversion bias using relaxed read editing distance (0.8).

Supplement: 9c1118dd6e62e15447ca9844381365ec_genetics.114.166124-4.pdf [file 9c1118dd6e62e15447ca9844381365ec_genetics.114.166124-4.pdf]
